# Supplementary material for: Facilitated carbon dioxide reduction using a Zn(ii) complex
Source: Royal Society of Chemistry journal article supplement (doi:10.1039/c5cc07318a), 2015-12-08
Supplement: c5cc07318a1.pdf [file c5cc07318a1.pdf]

## Supporting Information

### Facilitated carbon dioxide reduction using a Zn(II) complex

Elizabeth S. Donovan, Brian M. Barry, Christopher A. Larsen, Melissa N. Wirtz, William E. Geiger, and Richard A. Kemp\*

Corresponding author: Richard A. Kemp, email: rakemp@unm.edu

#### Contents

|                                                                                                                 |       |
|-----------------------------------------------------------------------------------------------------------------|-------|
| General synthetic procedures.....                                                                               | S2    |
| Synthesis of <b>1</b> .....                                                                                     | S2    |
| Synthesis of <b>2</b> .....                                                                                     | S2    |
| Figs. S1-S6. NMR Spectra of compounds <b>1</b> and <b>2</b> .....                                               | S3-S8 |
| Detail of electrochemical conditions and analytical methods.....                                                | S9    |
| Calculation of TOF.....                                                                                         | S9    |
| Fig. S7. CV of <b>1</b> and <b>2</b> illustrating no reversibility.....                                         | S10   |
| Fig. S8. CV of <b>2</b> under Ar and CO <sub>2</sub> with control and free pyPPh <sub>2</sub> ligand scans..... | S11   |
| Fig. S9. CV of free PhPpy <sub>2</sub> ligand under Ar and CO <sub>2</sub> .....                                | S12   |
| Fig. S10. CV of <b>1</b> under Ar and CO <sub>2</sub> .....                                                     | S13   |
| Fig. S11. LSV of <b>2</b> under CO <sub>2</sub> at varied concentrations.....                                   | S14   |
| Fig. S12. CV of <b>2</b> with Added Acetic Acid.....                                                            | S15   |
| Fig. S13. EI mass spectrum of CO <sub>2</sub> reported in the NIST database .....                               | S16   |
| Crystallographic details for compound <b>1</b> .....                                                            | S17   |
| Crystallographic details for compound <b>2</b> .....                                                            | S32   |

**General synthetic procedures.** Reactions were performed using an Ar (g) atmosphere glove box and standard Schlenk techniques. Solvents were purchased from Aldrich and subjected to an LC Technology solvent purification system prior to use. Reagents were purchased from Aldrich without further purification. Bis(2-pyridyl)phenylphosphine was prepared according to the method reported by Saucedo, *et. al.*<sup>1</sup> Despite repeated attempts, and even when employing added oxidant, combustion analyses consistently produced lower than expected C values. We attribute this to incomplete combustion upon metal carbide formation as has been reported for other transition metals.<sup>2</sup> Because we are unable to report EA values as an indication of sample purity, we have included all NMR spectra for compounds **1** and **2** (Figures S1-S6).

**Synthesis of (1), Dichloro[phenyldi(2-pyridyl)phosphine- $\kappa^2$ -N,N']zinc(II)·0.5THF.** Solid ZnCl<sub>2</sub> (1.54 g, 11.3 mmol) was added to a gold, translucent stirred solution of phenyldi(2-pyridyl)phosphine (2.99 g, 11.3 mmol) in ca. 30 mL of THF. Within minutes a reaction occurred resulting in a white precipitate and loss of gold color in the supernatant. The reaction was allowed to stir for 2h at room temperature. The resulting white powder was then isolated by filtration and washed with fresh THF (3 × 10 mL), and dried under vacuum for 1h. Yield = 3.90 g (79%). Colorless single crystals were grown from a CH<sub>2</sub>Cl<sub>2</sub>/pentane mixture. <sup>1</sup>H NMR (CD<sub>2</sub>Cl<sub>2</sub>, 300 MHz):  $\delta$  1.82 (m, 2H, THF), 3.68 (m, 2H, THF), 7.19 (d, <sup>3</sup>J<sub>H-H</sub> = 8.2 Hz, 2H, 6-C<sub>6</sub>H<sub>4</sub>N), 7.52 (m, 2H, 5-C<sub>6</sub>H<sub>4</sub>N), 7.67 (m, 2H, 4-C<sub>6</sub>H<sub>4</sub>N), 7.72-7.87 (overlapping multiplets, 5H, C<sub>6</sub>H<sub>5</sub>), 9.00 (d, <sup>3</sup>J<sub>H-H</sub> = 5.3 Hz, 2H, 3-C<sub>6</sub>H<sub>4</sub>N). <sup>13</sup>C{<sup>1</sup>H} (CD<sub>2</sub>Cl<sub>2</sub>, 75 MHz):  $\delta$  25.9 (s, THF), 68.2 (s, THF), all aromatic C: 124.5 (d, J<sub>P-C</sub> = 1.6 Hz), 128.7 (d, J<sub>P-C</sub> = 11 Hz), 129.9 (d, J<sub>P-C</sub> = 4.7 Hz), 130.8 (d, J<sub>P-C</sub> = 9.9 Hz), 133.2 (d, J<sub>P-C</sub> = 1.6 Hz), 138.6 (d, J<sub>P-C</sub> = 25 Hz), 139.7, 150.7 (d, J<sub>P-C</sub> = 4.6 Hz), 162.0 (d, J<sub>P-C</sub> = 18 Hz). <sup>31</sup>P{<sup>1</sup>H} (CD<sub>2</sub>Cl<sub>2</sub>, 121 MHz)  $\delta$  -5.22 ppm. Mp 269-271 °C.

**Synthesis of (2), Dichloro[diphenyl(2-pyridyl)phosphine- $\kappa^1$ -N]zinc(II).** Solid ZnCl<sub>2</sub> (65 mg, 0.47 mmol) was added to a colorless, translucent stirred solution of diphenyl-2-pyridylphosphine (250 mg, 0.95 mmol) in ca. 10 mL of THF. The reaction mixture was allowed to stir for 2h at room temperature followed by removal of solvent *in vacuo* permitting collection of a white powder. Yield = 141 mg (45%). Colorless crystals suitable for single-crystal x-ray diffraction were grown from slow evaporation of CH<sub>2</sub>Cl<sub>2</sub>. <sup>1</sup>H NMR (CD<sub>2</sub>Cl<sub>2</sub>, 300 MHz):  $\delta$  7.19 (m, 8H, *m*-C<sub>6</sub>H<sub>5</sub>), 7.24-7.40 (overlapping multiplets, 14H, *o,p*-C<sub>6</sub>H<sub>5</sub> and 6-C<sub>6</sub>H<sub>4</sub>N), 7.45 (m, 2H, 4-C<sub>6</sub>H<sub>4</sub>N), 7.77 (m, 2H, 5-C<sub>6</sub>H<sub>4</sub>N), 9.19 (d, <sup>3</sup>J<sub>H-H</sub> = 5.0 Hz, 2H, 3-C<sub>6</sub>H<sub>4</sub>N). <sup>13</sup>C{<sup>1</sup>H} (CD<sub>2</sub>Cl<sub>2</sub>, 75 MHz):  $\delta$  all aromatic C: 124.8 (s), 129.1 (d, J<sub>P-C</sub> = 7.3 Hz), 129.8 (s), 131.2 (d, J<sub>P-C</sub> = 7.8 Hz), 134.1 (d, J<sub>P-C</sub> = 19 Hz), 134.8 (d, J<sub>P-C</sub> = 5.2 Hz), 138.5 (s), 151.7 (d, J<sub>P-C</sub> = 13 Hz), 163.2 (s). <sup>31</sup>P{<sup>1</sup>H} (CD<sub>2</sub>Cl<sub>2</sub>, 121 MHz)  $\delta$  -5.77 ppm. Mp 176-178 °C.

<sup>1</sup> Saucedo, A.S.A.; Hagenbach, A.; Abram, U., *Polyhedron*, **2008**, *27*, 3587 – 3592.

<sup>2</sup> Stephan, D. W.; Stewart, J. C.; Guérin, F.; Courtenay, S.; Kickham, J.; Hollink, E.; Beddie, C.; Hoskin, A.; Graham, T.; Wei, P.; Spence, R. E. v. H.; Xu, W.; Koch, L.; Gao, X.; Harrison, D. G., *Organometallics* **2003**, *22* (9), 1937-1947.

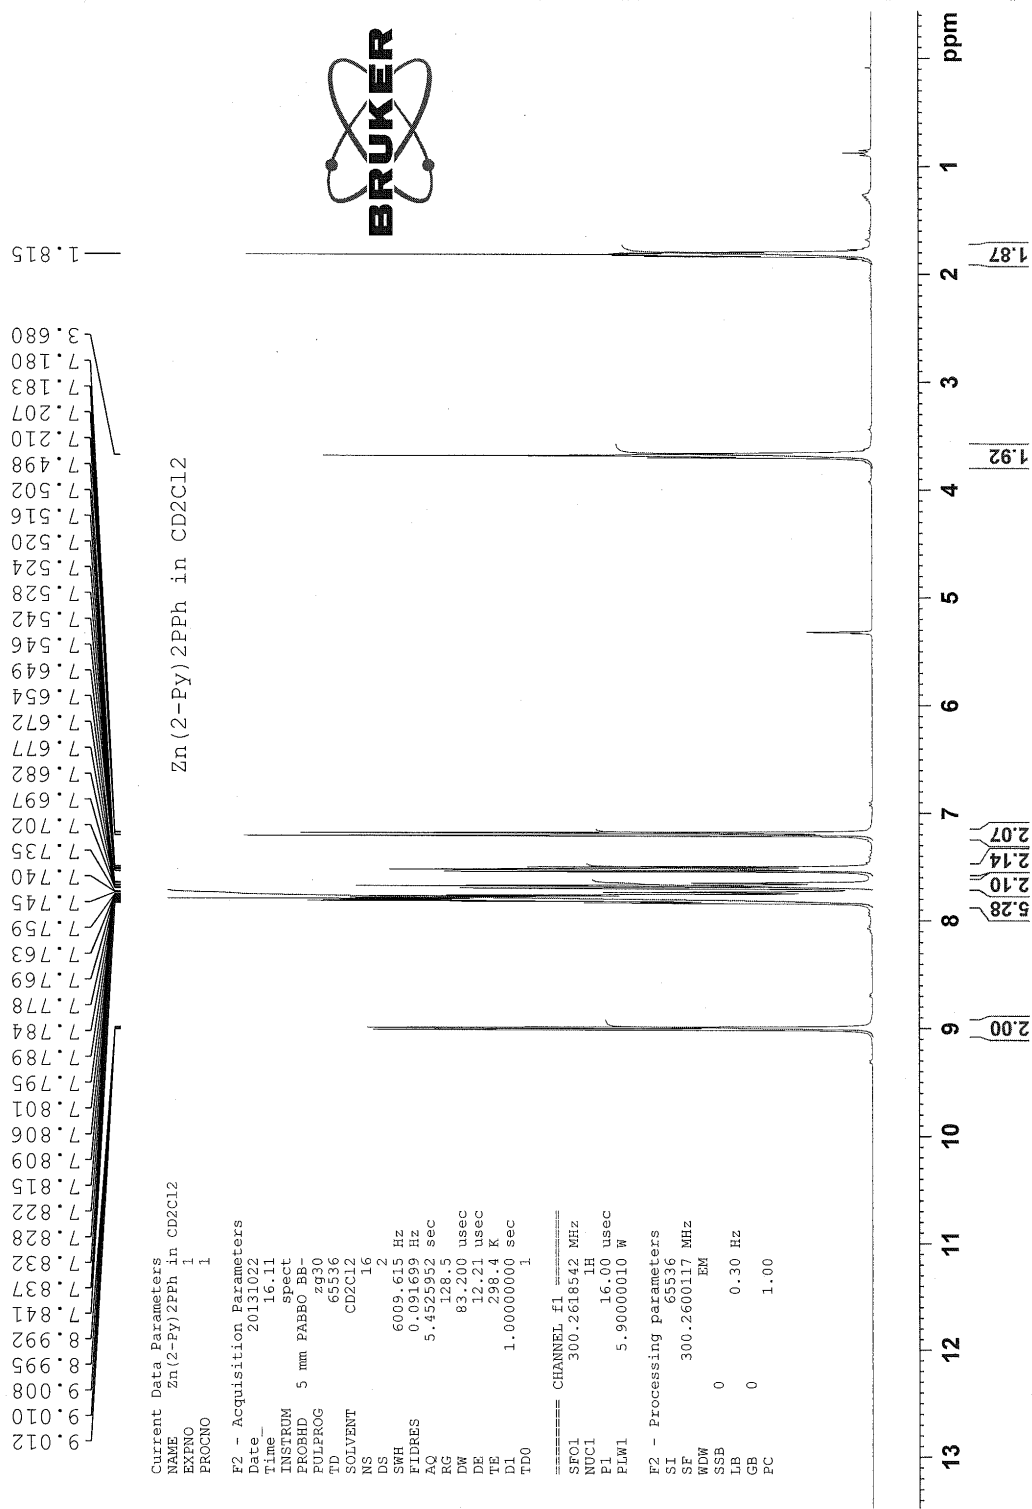Figure S1. <sup>1</sup>H NMR of compound **1** in CD<sub>2</sub>Cl<sub>2</sub>

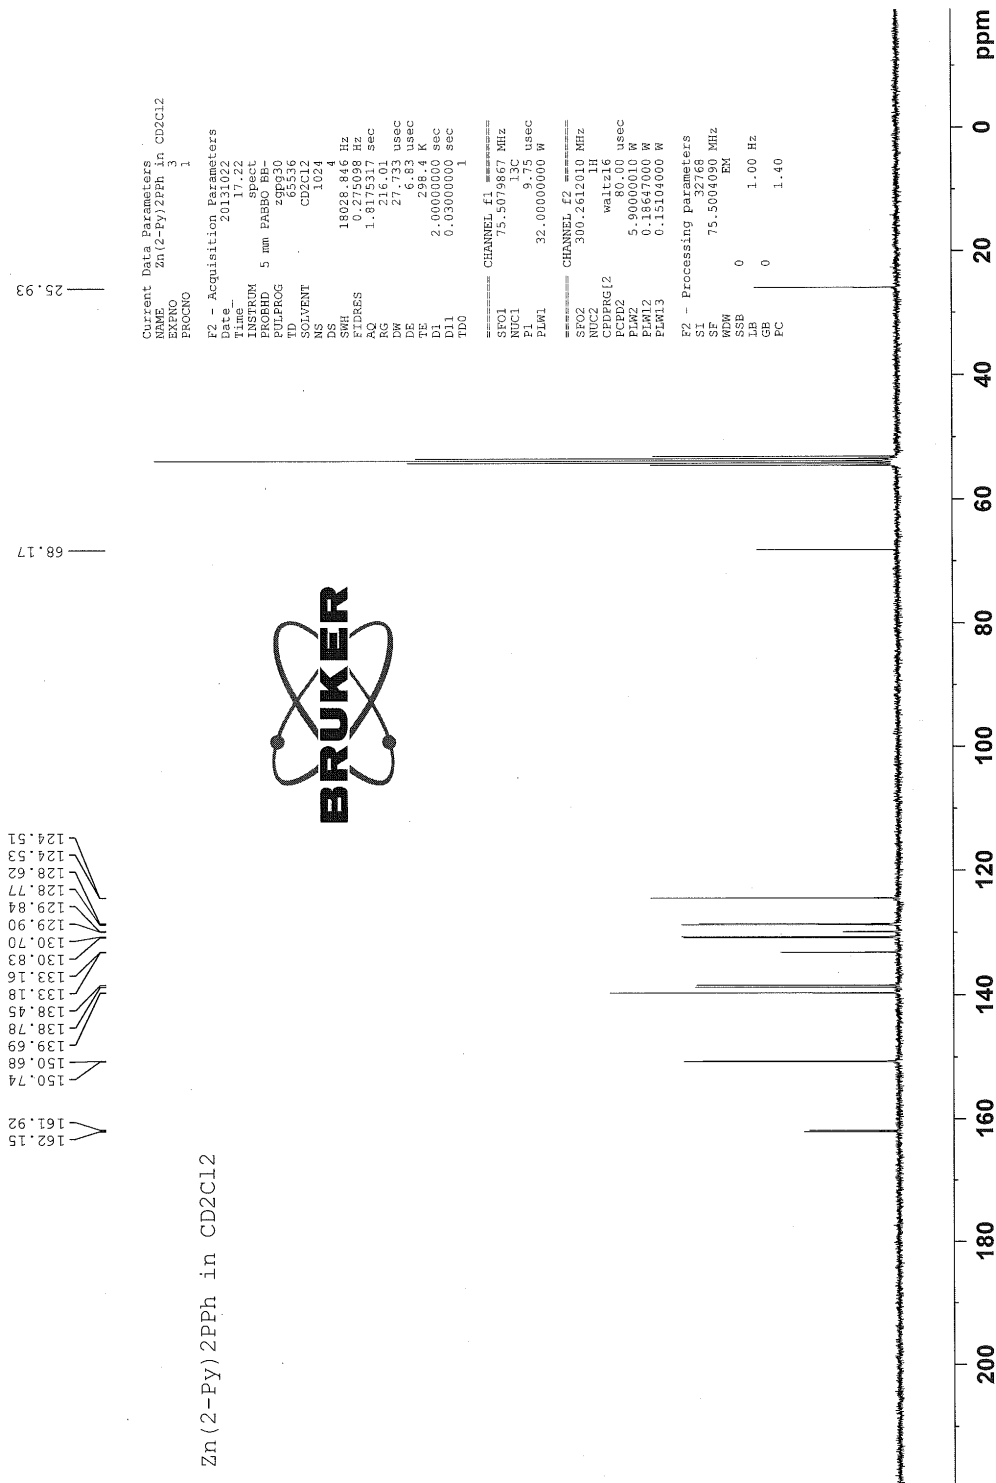Figure S2.  $^{13}\text{C}\{^1\text{H}\}$  NMR of compound 1 in  $\text{CD}_2\text{Cl}_2$ .

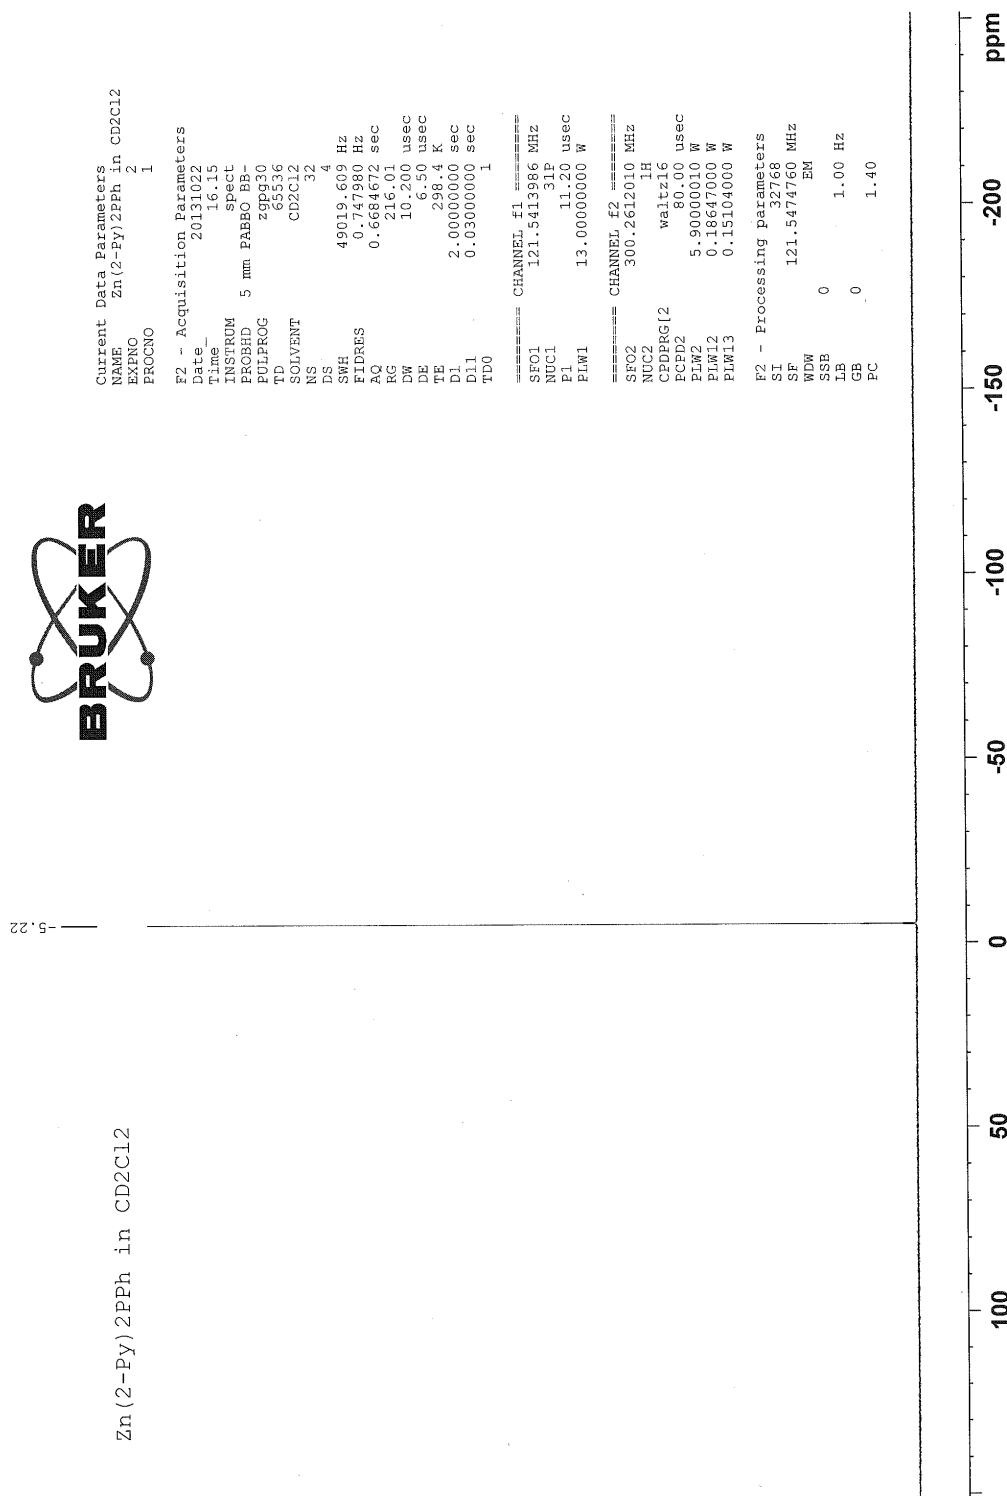Figure S3. <sup>31</sup>P{<sup>1</sup>H} NMR of compound **1** in CD<sub>2</sub>Cl<sub>2</sub>.

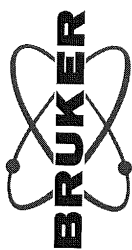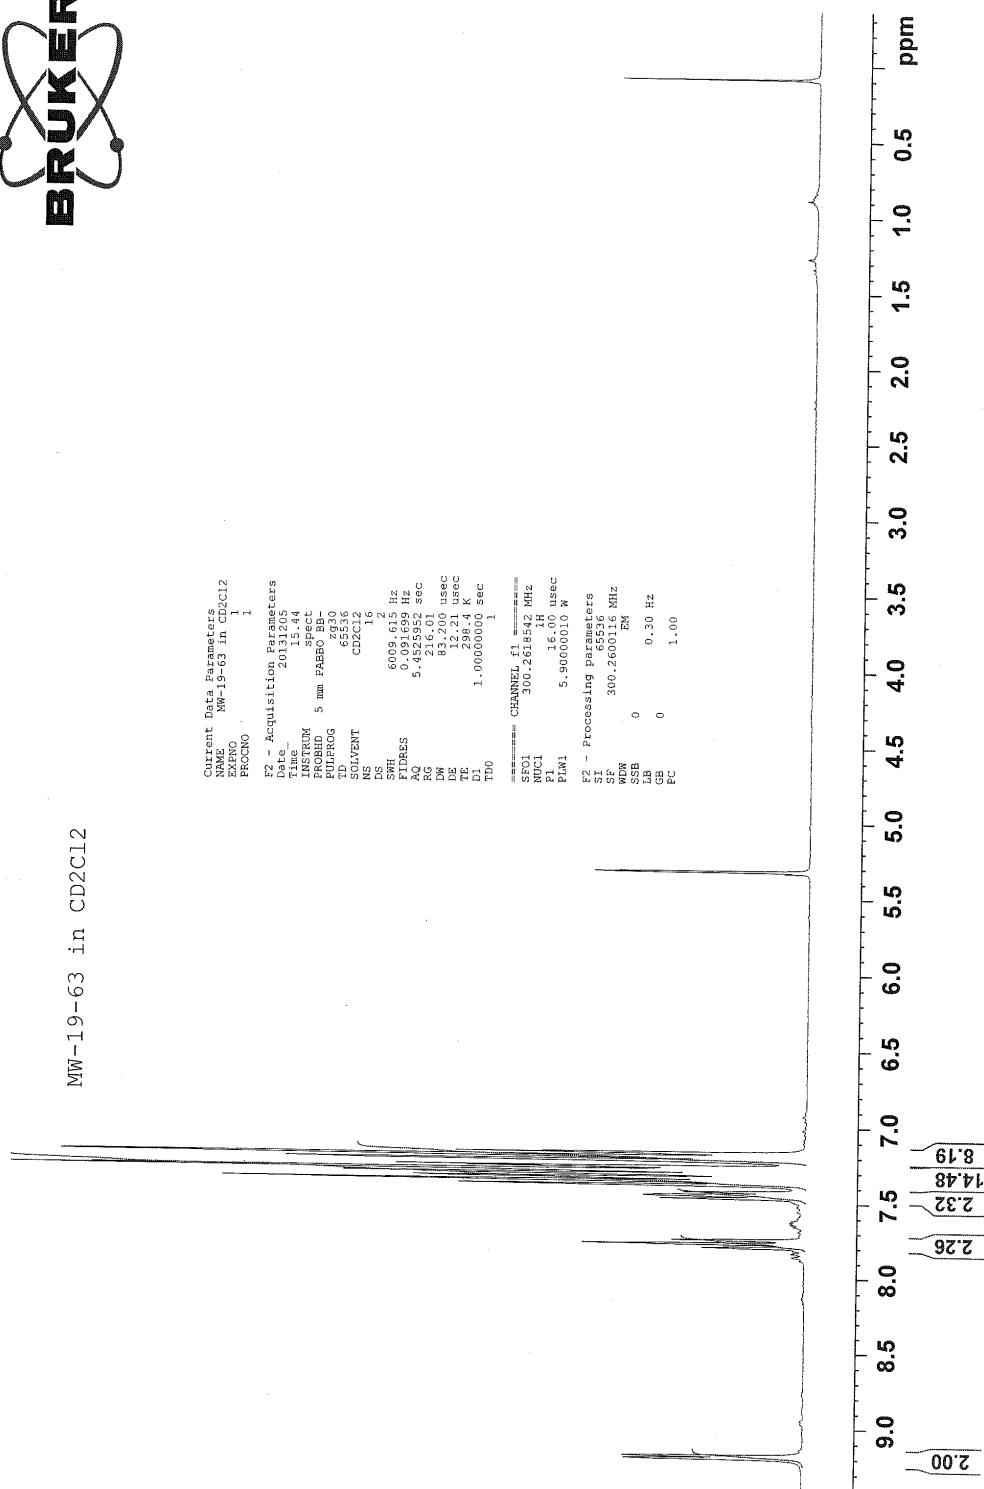

Figure S4.  $^1\text{H}$  NMR of compound **2** in  $\text{CD}_2\text{Cl}_2$ . Signal at 0.09 ppm attributed to silicone grease.

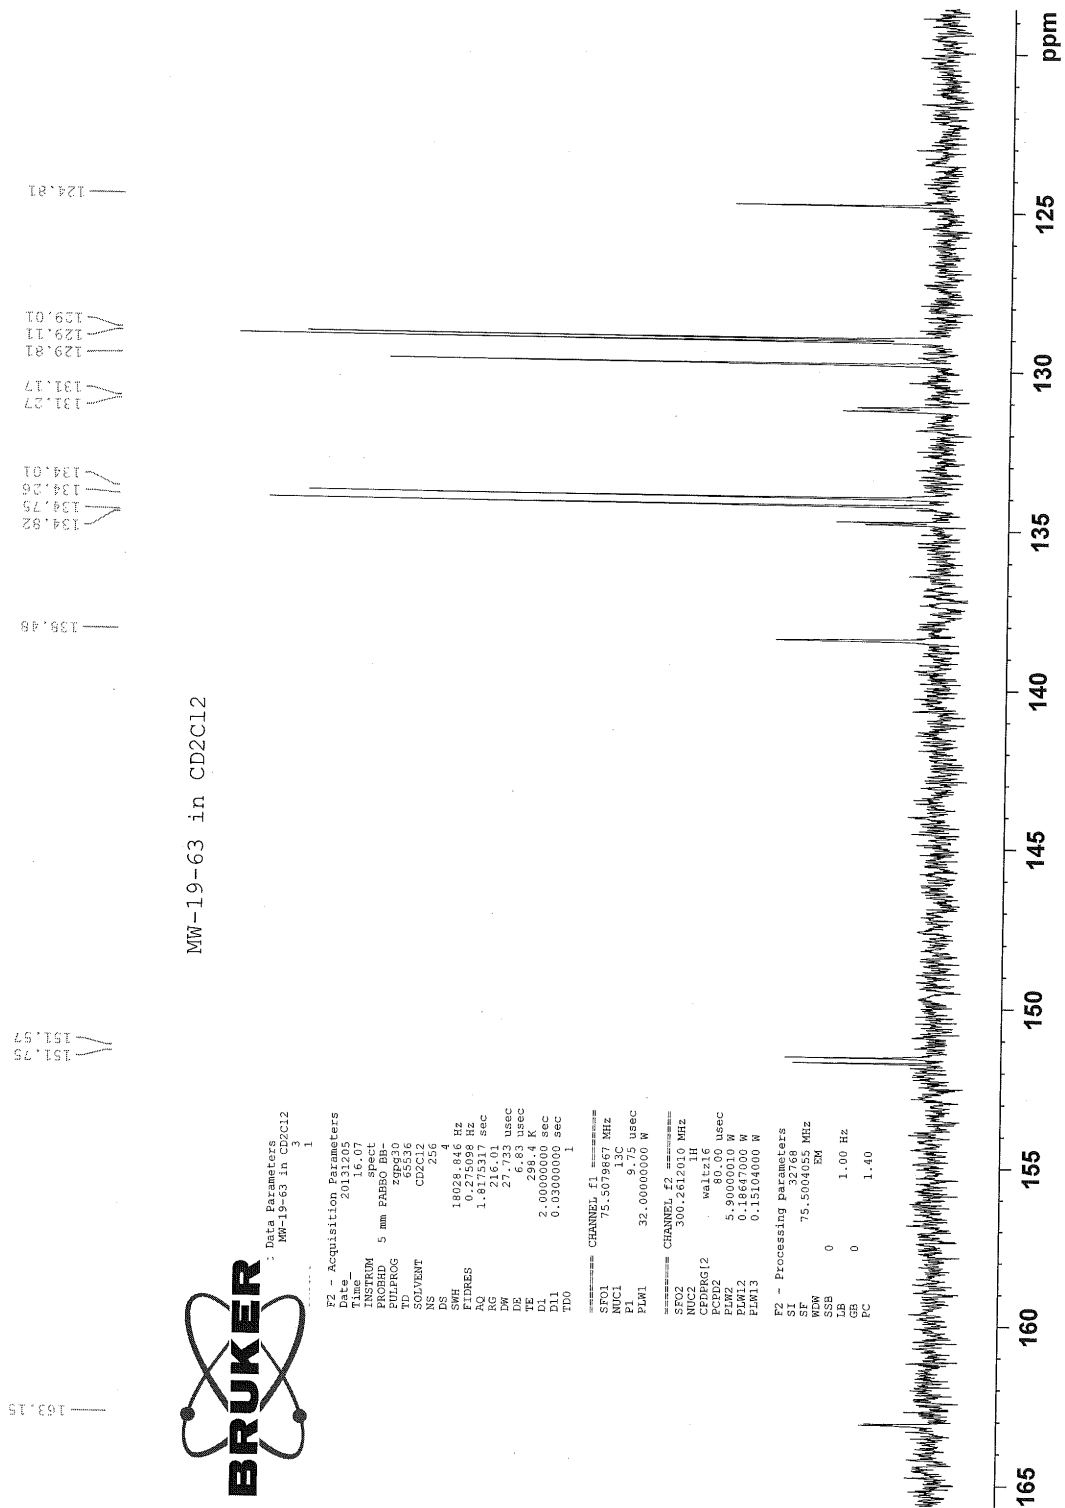Figure S5.  $^{13}\text{C}\{^1\text{H}\}$  NMR of compound **2** in  $\text{CD}_2\text{Cl}_2$ .

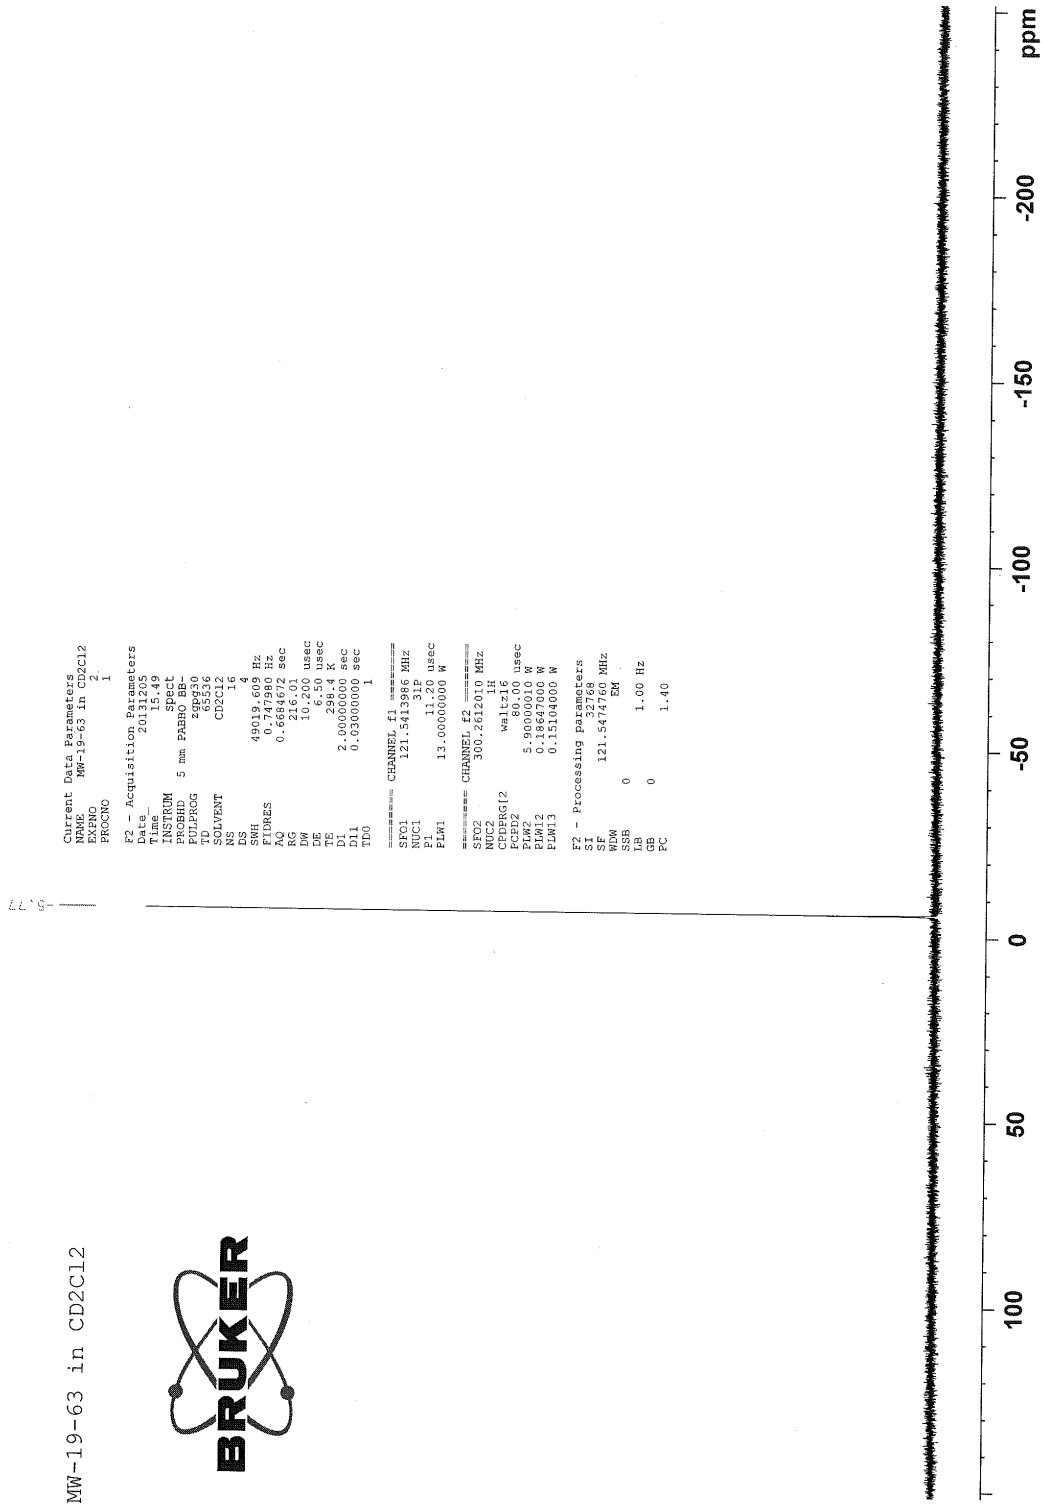Figure S6.  $^{31}\text{P}\{^1\text{H}\}$  NMR of compound **2** in  $\text{CD}_2\text{Cl}_2$ .



**Detail of electrochemical conditions and analytical methods.** A 3-electrode cell was used for all CV measurements with a 3 mm diameter glassy carbon working electrode. The auxiliary electrode was a coiled Pt wire and the reference electrode was a silver wire in 10 mM AgNO<sub>3</sub> in electrolyte solution contained in a fritted half-cell obtained from CH Instruments. Reported potentials are referenced to the ferrocene/ferrocenium redox couple that was measured at the conclusion of each experiment. Electrolyte solution was 0.10 M tetrabutylammonium hexafluorophosphate (Bu<sub>4</sub>NPF<sub>6</sub>) in 99.9% anhydrous inhibitor-free THF using electrochemical grade Bu<sub>4</sub>NPF<sub>6</sub> from Sigma-Aldrich without further purification. The cell was purged of O<sub>2</sub> prior to each experiment with the gas noted in the figures (CO<sub>2</sub> or Ar). The CO<sub>2</sub> (g) used in experiments was of research purity at 99.999% purchased from Matheson TriGas and passed through anhydrous CaSO<sub>4</sub> Drierite prior to use in all experiments.

The CPE experiments were conducted under pseudo-airtight conditions saturated with CO<sub>2</sub> (g) with vigorous stirring using a reticulated vitreous carbon working electrode, a coiled Pt wire contained in a fritted chamber (obtained from BAS Inc.), and the same reference electrode as used for CV measurements. An airtight syringe was used to measure the composition of the CPE headspace *via* mass spectrometry before applying a potential and after holding a potential of -1.80 V for 4 hours that lead to a plateau of residual current, indicating 99% completion of electrolysis. Faradaic efficiency was not calculated nor investigated for this publication since the CPE cell is not quantitatively air-tight. GC/MS measurements were obtained using a Hewlett Packard 5890 Series II Plus Gas Chromatograph using He carrier gas on a Agilent J&W 20 m x 0.180 mm x 1.00 μm DB-624 column observing the mass spectra of the eluent at 1.76 minutes with a Hewlett Packard 5972 Series Mass Selective Detector.

Infrared spectra were recorded on a Nicolet 6700 FT-IR with samples between KBr salt plates. NMR spectra were recorded on a Bruker 300 MHz spectrometer. Crystal structures were determined using a full-matrix least-squares on F<sup>2</sup> refinement method on Apex II software, with R-values for **1** and **2** of 6.33% and 6.40%, respectively.

**Calculation of turnover frequency.** The following equation was employed to report the TOF of 96 s<sup>-1</sup> for **2**, noting that the peak potential for catalytic current (*i<sub>c</sub>*) is not equivalent to the peak potential for the catalyst (*i<sub>p</sub>*), and therefore this TOF value should be interpreted as a gross approximation. Here, *n* is the number of electrons involved in each catalytic turnover, *R* is the universal gas constant, *T* is temperature, *F* is the Faraday constant, *v* is the scan rate, and *k<sub>obs</sub>* is the observed rate constant reported as the turnover frequency, TOF.

$$\frac{i_c}{i_p} = \frac{n}{0.4463} \sqrt{\frac{RTk_{obs}}{Fv}}$$

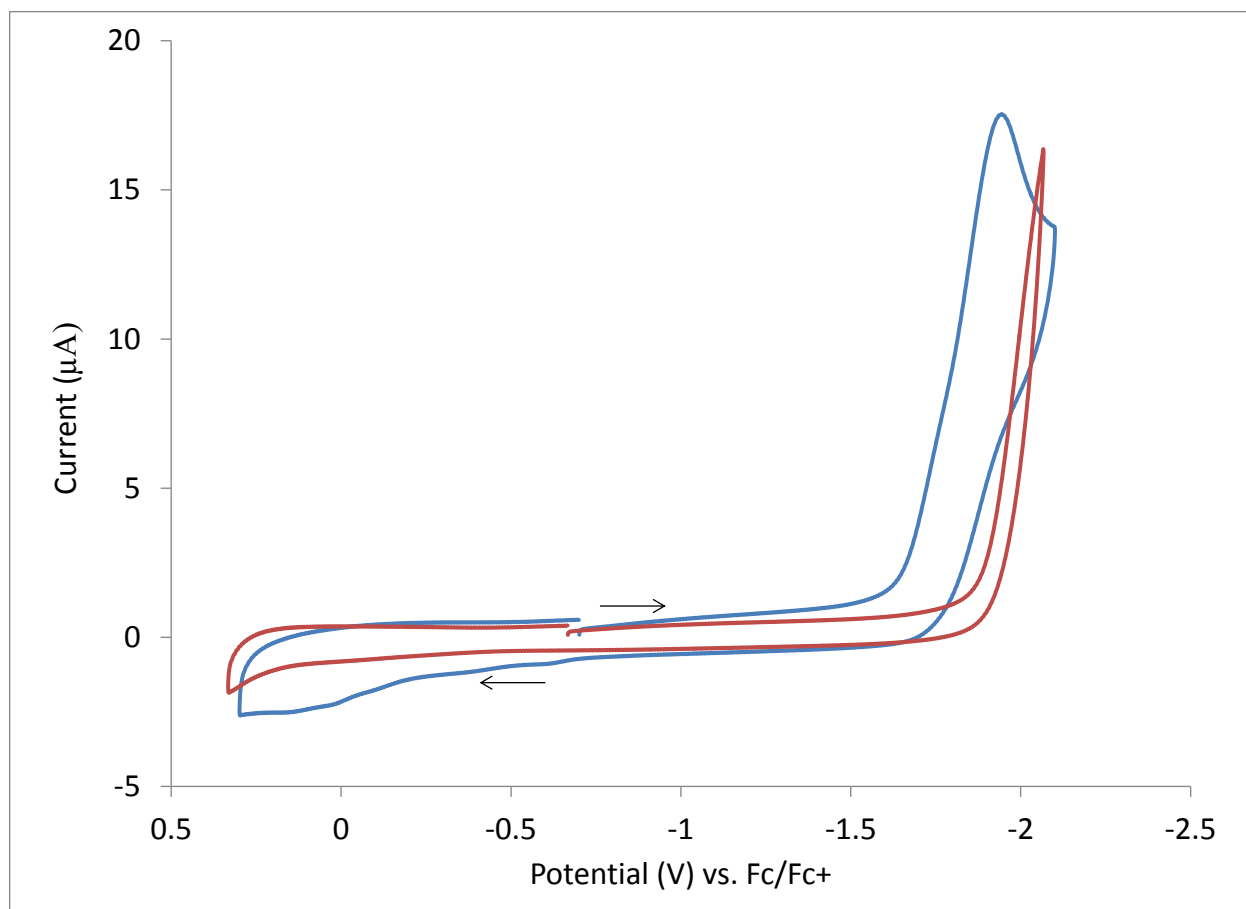

Figure S7. CV of **1** (blue) and **2** (red) at concentrations of 1.0 mM at 0.5 Vs<sup>-1</sup> in THF under Ar(g) at GC WE.

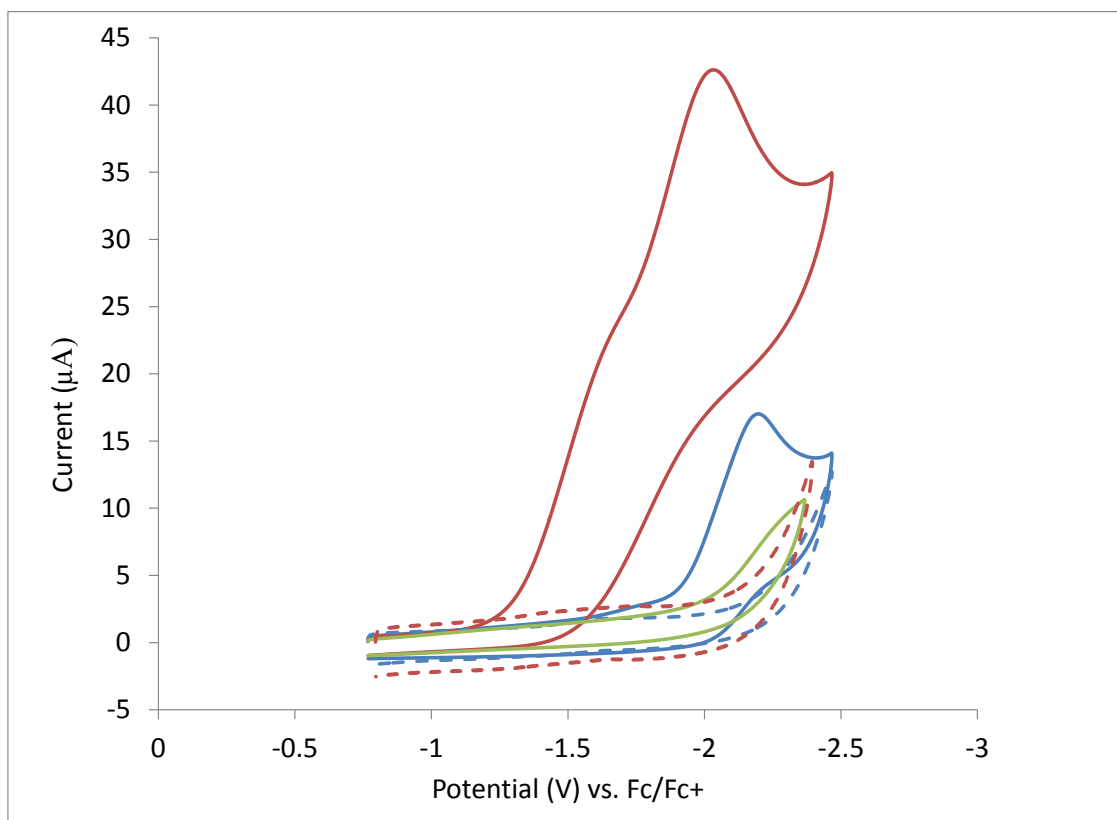

Figure S8. Control experiments for cyclic voltammograms shown in Figure 5 (main paper) (shown as solid red and solid blue lines); 1.98 mM pyPPh<sub>2</sub> purged with CO<sub>2</sub> (g) atmosphere (solid green line); electrolyte solution without analyte purged with Ar (g) atmosphere (dashed blue line); electrolyte solution without analyte purged with CO<sub>2</sub> (g) atmosphere (dashed red line). Scan rate is 0.5 V s<sup>-1</sup>.

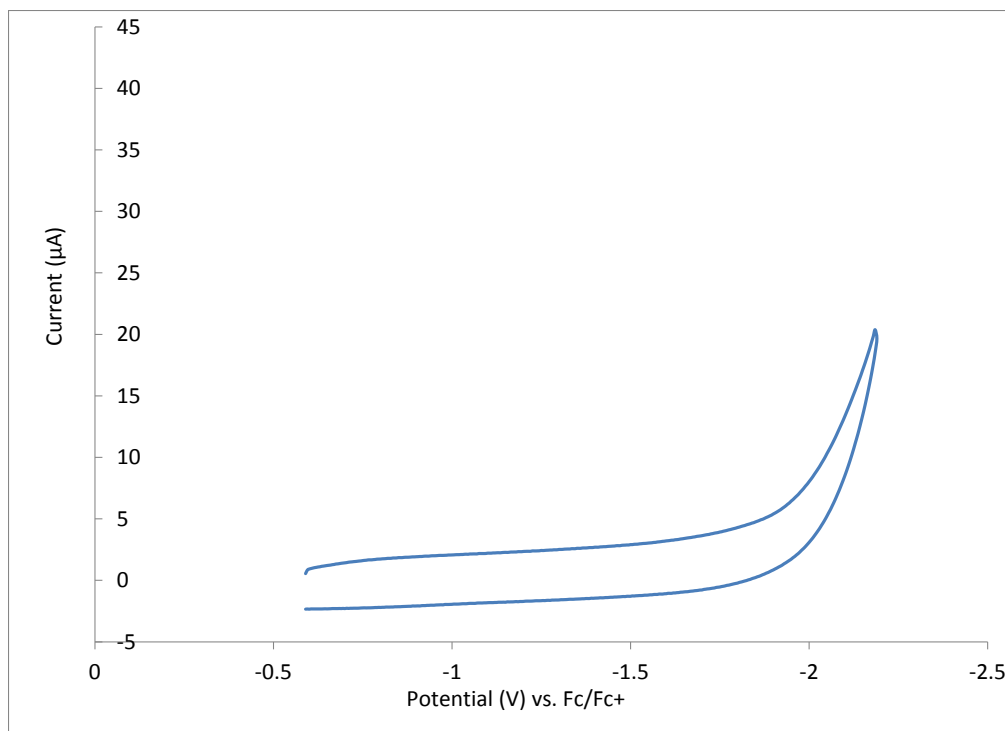

Figure S9. Cyclic voltammogram of 1.99 mM PhPpy<sub>2</sub> purged with CO<sub>2</sub> (g) atmosphere using a 0.5 V s<sup>-1</sup> scan rate, illustrating no electroactivity in the observed potential range until the solvent (THF) front is reached. Scanning from -0.5 to -2.1 to -0.5 V.

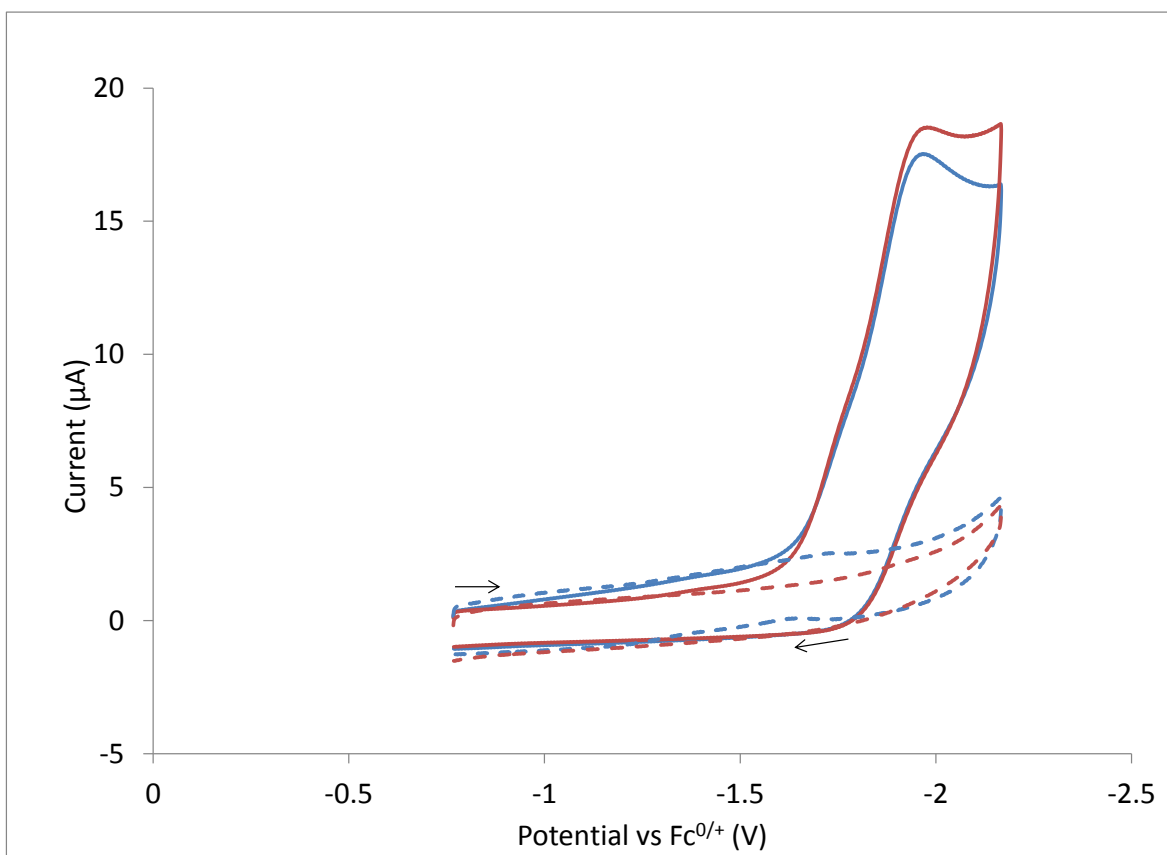

Figure S10. CV of 1.13 mM **1** at  $0.5 \text{ Vs}^{-1}$  under an Ar (g) atmosphere (solid blue line) and under a  $\text{CO}_2$  (g) atmosphere (solid red line). Background scans at  $0.5 \text{ Vs}^{-1}$  of solely electrolyte under Ar (g) (dashed blue line) and under  $\text{CO}_2$  (g) (dashed red line) are also shown.

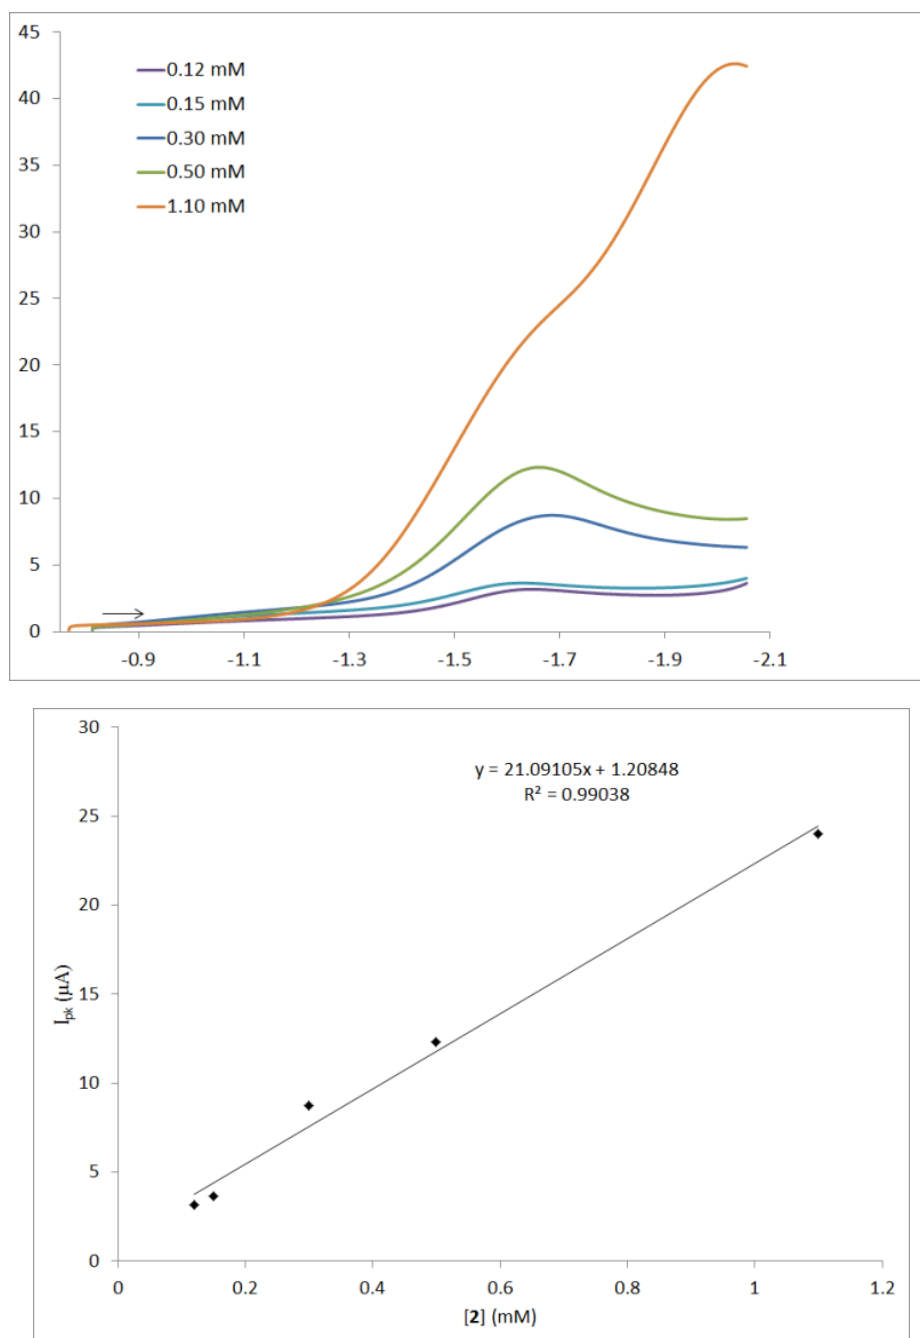

Figure S11. LSV of **2** at the concentrations indicated at  $0.5 \text{ Vs}^{-1}$  under a  $\text{CO}_2$  (g) atmosphere (top); plot of current at the catalytic peak potential of  $-1.66 \text{ V}$ ,  $I_{pk}$ , versus the concentration of **2** (bottom).

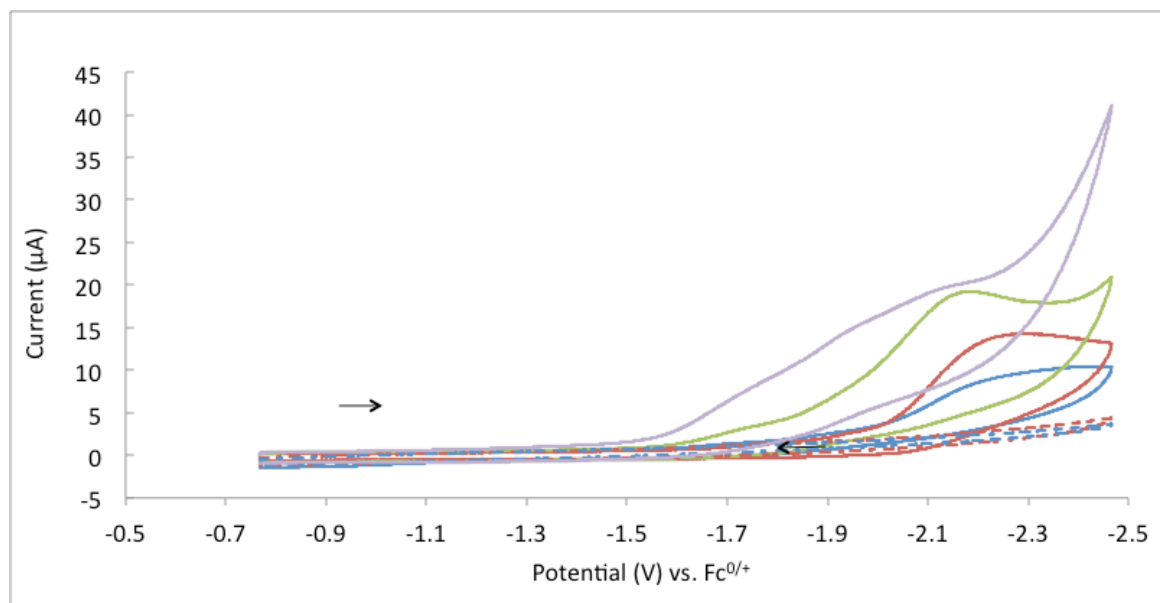

Figure S12. CV of *ca.* 1.0 mM **2** at 0.5 Vs<sup>-1</sup> under an Ar (g) atmosphere (solid red line); under a CO<sub>2</sub> (g) atmosphere (solid blue line); under CO<sub>2</sub> (g) atmosphere with 1 mM acetic acid (solid green line); under CO<sub>2</sub> (g) atmosphere with 5 mM acetic acid (solid purple line). Scans at 0.5 Vs<sup>-1</sup> of solely electrolyte with 1 mM acetic acid under Ar (g) (dashed red line) and under CO<sub>2</sub> (g) (dashed blue line) are also shown.

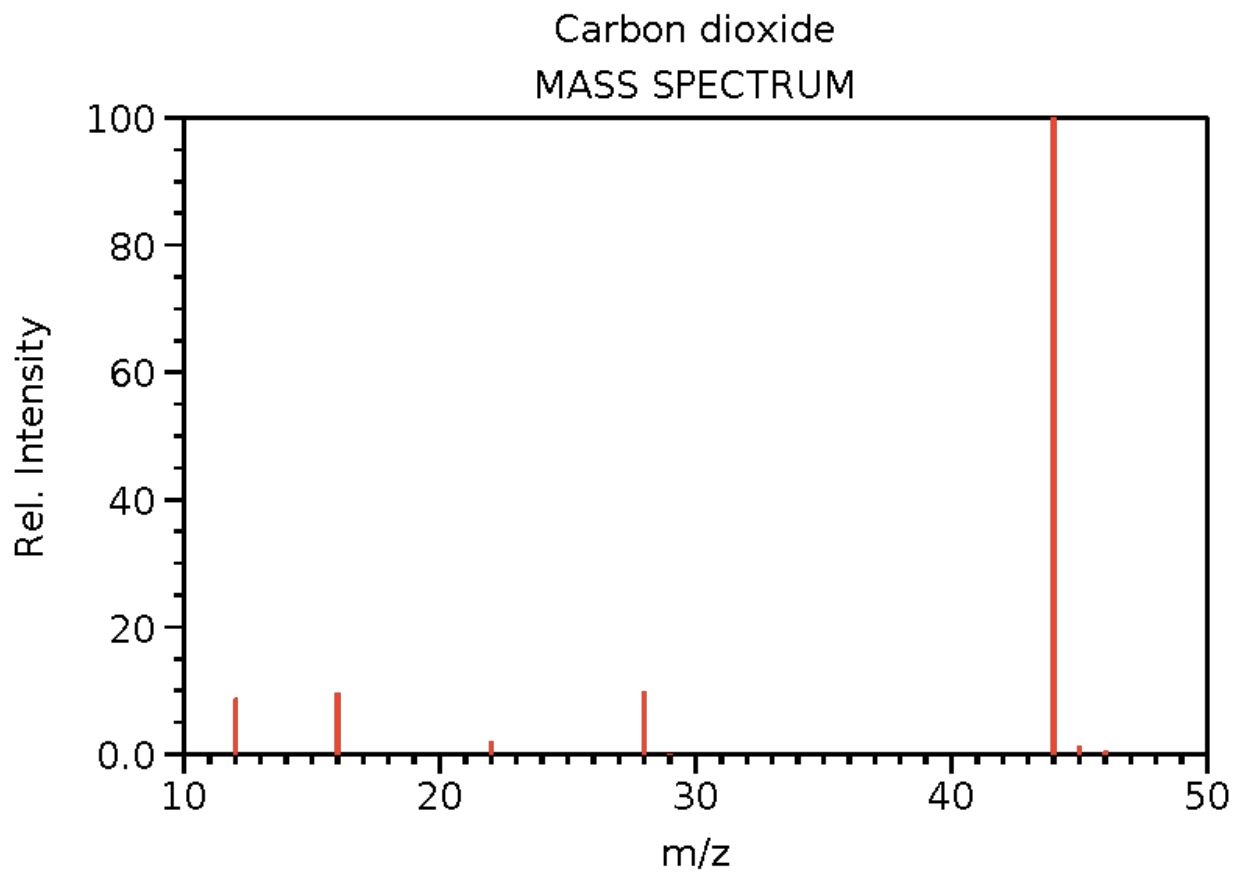

NIST Chemistry WebBook (<http://webbook.nist.gov/chemistry>)

Figure S13. EI mass spectrum of CO<sub>2</sub> reported in the NIST database.

<http://webbook.nist.gov/cgi/cbook.cgi?ID=C124389&Mask=200#Mass-Spec>



**Crystallographic details for compound 1.**

Table 1. Crystal data and structure refinement for rkbb10\_0m. (CCDC 1029655)

|                                   |                                                                                       |                 |
|-----------------------------------|---------------------------------------------------------------------------------------|-----------------|
| Identification code               | rkbb10_0m                                                                             |                 |
| Empirical formula                 | C <sub>18</sub> H <sub>17</sub> Cl <sub>2</sub> N <sub>2</sub> O <sub>0.50</sub> P Zn |                 |
| Formula weight                    | 436.58                                                                                |                 |
| Temperature                       | 173(2) K                                                                              |                 |
| Wavelength                        | 0.71073 Å                                                                             |                 |
| Crystal system                    | Monoclinic                                                                            |                 |
| Space group                       | P2(1)/c                                                                               |                 |
| Unit cell dimensions              | a = 16.0669(5) Å                                                                      | α = 90°.        |
|                                   | b = 12.2540(4) Å                                                                      | β = 98.966(2)°. |
|                                   | c = 19.5763(7) Å                                                                      | γ = 90°.        |
| Volume                            | 3807.2(2) Å <sup>3</sup>                                                              |                 |
| Z                                 | 8                                                                                     |                 |
| Density (calculated)              | 1.523 Mg/m <sup>3</sup>                                                               |                 |
| Absorption coefficient            | 1.660 mm <sup>-1</sup>                                                                |                 |
| F(000)                            | 1776                                                                                  |                 |
| Crystal size                      | 0.64 x 0.14 x 0.13 mm <sup>3</sup>                                                    |                 |
| Theta range for data collection   | 1.28 to 30.60°.                                                                       |                 |
| Index ranges                      | -22 ≤ h ≤ 22, -17 ≤ k ≤ 17, -27 ≤ l ≤ 27                                              |                 |
| Reflections collected             | 58745                                                                                 |                 |
| Independent reflections           | 11629 [R(int) = 0.0820]                                                               |                 |
| Completeness to theta = 30.60°    | 99.4 %                                                                                |                 |
| Absorption correction             | Semi-empirical from equivalents                                                       |                 |
| Max. and min. transmission        | 0.8119 and 0.4150                                                                     |                 |
| Refinement method                 | Full-matrix least-squares on F <sup>2</sup>                                           |                 |
| Data / restraints / parameters    | 11629 / 0 / 442                                                                       |                 |
| Goodness-of-fit on F <sup>2</sup> | 1.094                                                                                 |                 |
| Final R indices [I > 2σ(I)]       | R1 = 0.0633, wR2 = 0.1562                                                             |                 |
| R indices (all data)              | R1 = 0.1173, wR2 = 0.1779                                                             |                 |
| Largest diff. peak and hole       | 1.089 and -0.787 e.Å <sup>-3</sup>                                                    |                 |

Table 2. Atomic coordinates ( $\times 10^4$ ) and equivalent isotropic displacement parameters ( $\text{\AA}^2 \times 10^3$ ) for rkb10\_0m.  $U(\text{eq})$  is defined as one third of the trace of the orthogonalized  $U^{ij}$  tensor.

|       | x        | y        | z        | $U(\text{eq})$ |
|-------|----------|----------|----------|----------------|
| Zn(1) | 8653(1)  | 2342(1)  | 6701(1)  | 29(1)          |
| Zn(2) | 4447(1)  | 2169(1)  | 1133(1)  | 26(1)          |
| P(1)  | 10282(1) | 1750(1)  | 7889(1)  | 26(1)          |
| P(2)  | 5410(1)  | 2630(1)  | 2711(1)  | 23(1)          |
| Cl(1) | 9516(1)  | 2429(1)  | 5929(1)  | 39(1)          |
| Cl(2) | 7295(1)  | 2687(1)  | 6395(1)  | 41(1)          |
| Cl(3) | 4381(1)  | 1929(1)  | 4(1)     | 36(1)          |
| Cl(4) | 3265(1)  | 2067(1)  | 1589(1)  | 39(1)          |
| O(1)  | 1763(9)  | 4254(12) | 10141(7) | 273(9)         |
| N(1)  | 9041(3)  | 3275(3)  | 7572(2)  | 26(1)          |
| N(2)  | 8786(2)  | 900(3)   | 7249(2)  | 26(1)          |
| N(3)  | 5067(2)  | 3591(3)  | 1434(2)  | 24(1)          |
| N(4)  | 5345(2)  | 1160(3)  | 1648(2)  | 24(1)          |
| C(1)  | 10836(3) | 1409(4)  | 8746(2)  | 28(1)          |
| C(2)  | 10465(3) | 1366(4)  | 9346(3)  | 34(1)          |
| C(3)  | 10941(4) | 1104(5)  | 9972(3)  | 43(1)          |
| C(4)  | 11792(4) | 869(5)   | 10015(3) | 42(1)          |
| C(5)  | 12160(4) | 894(5)   | 9426(3)  | 41(1)          |
| C(6)  | 11694(3) | 1165(4)  | 8792(3)  | 35(1)          |
| C(7)  | 8628(3)  | 4213(4)  | 7654(3)  | 35(1)          |
| C(8)  | 8867(4)  | 4924(4)  | 8186(3)  | 40(1)          |
| C(9)  | 9567(4)  | 4671(5)  | 8659(3)  | 42(1)          |
| C(10) | 9988(3)  | 3698(4)  | 8603(3)  | 36(1)          |
| C(11) | 9706(3)  | 2996(4)  | 8053(2)  | 28(1)          |
| C(12) | 8173(3)  | 142(4)   | 7109(3)  | 32(1)          |
| C(13) | 8188(3)  | -825(4)  | 7468(3)  | 36(1)          |
| C(14) | 8849(3)  | -1018(4) | 7992(3)  | 33(1)          |
| C(15) | 9478(3)  | -244(4)  | 8149(2)  | 28(1)          |
| C(16) | 9428(3)  | 724(4)   | 7772(2)  | 24(1)          |
| C(17) | 6315(3)  | 2896(4)  | 3375(2)  | 24(1)          |
| C(18) | 6161(3)  | 3063(4)  | 4044(2)  | 33(1)          |

|       |          |          |          |         |
|-------|----------|----------|----------|---------|
| C(19) | 6805(4)  | 3264(5)  | 4579(3)  | 44(1)   |
| C(20) | 7627(4)  | 3282(5)  | 4458(3)  | 42(1)   |
| C(21) | 7800(3)  | 3103(4)  | 3792(3)  | 38(1)   |
| C(22) | 7143(3)  | 2918(4)  | 3246(2)  | 28(1)   |
| C(23) | 5059(4)  | 4413(4)  | 978(3)   | 35(1)   |
| C(24) | 5446(4)  | 5391(4)  | 1139(3)  | 37(1)   |
| C(25) | 5887(3)  | 5536(4)  | 1802(3)  | 32(1)   |
| C(26) | 5922(3)  | 4691(4)  | 2270(3)  | 27(1)   |
| C(27) | 5512(3)  | 3710(4)  | 2076(2)  | 23(1)   |
| C(28) | 5537(3)  | 220(4)   | 1350(2)  | 28(1)   |
| C(29) | 6061(3)  | -561(4)  | 1688(3)  | 32(1)   |
| C(30) | 6418(3)  | -367(4)  | 2367(3)  | 32(1)   |
| C(31) | 6266(3)  | 624(4)   | 2668(3)  | 28(1)   |
| C(32) | 5730(3)  | 1379(4)  | 2299(2)  | 23(1)   |
| C(33) | 2251(11) | 5244(13) | 10371(9) | 240(13) |
| C(34) | 2856(7)  | 5446(8)  | 10005(6) | 101(3)  |
| C(35) | 2945(7)  | 4566(8)  | 9586(7)  | 124(5)  |
| C(36) | 2397(8)  | 3790(8)  | 9704(6)  | 110(4)  |

---

Table 3. Bond lengths [ $\text{\AA}$ ] and angles [ $^\circ$ ] for rkbb10\_0m.

---

|             |            |
|-------------|------------|
| Zn(1)-N(2)  | 2.061(4)   |
| Zn(1)-N(1)  | 2.067(4)   |
| Zn(1)-Cl(1) | 2.2069(14) |
| Zn(1)-Cl(2) | 2.2107(14) |
| Zn(2)-N(4)  | 2.043(4)   |
| Zn(2)-N(3)  | 2.047(4)   |
| Zn(2)-Cl(3) | 2.2159(13) |
| Zn(2)-Cl(4) | 2.2245(14) |
| P(1)-C(1)   | 1.821(5)   |
| P(1)-C(11)  | 1.839(5)   |
| P(1)-C(16)  | 1.848(5)   |
| P(2)-C(17)  | 1.822(5)   |
| P(2)-C(27)  | 1.841(5)   |
| P(2)-C(32)  | 1.843(5)   |
| O(1)-C(33)  | 1.476(14)  |
| O(1)-C(36)  | 1.538(15)  |
| N(1)-C(7)   | 1.349(6)   |
| N(1)-C(11)  | 1.354(6)   |
| N(2)-C(12)  | 1.350(6)   |
| N(2)-C(16)  | 1.353(6)   |
| N(3)-C(23)  | 1.344(6)   |
| N(3)-C(27)  | 1.354(5)   |
| N(4)-C(28)  | 1.349(6)   |
| N(4)-C(32)  | 1.353(6)   |
| C(1)-C(2)   | 1.397(7)   |
| C(1)-C(6)   | 1.400(7)   |
| C(2)-C(3)   | 1.378(7)   |
| C(3)-C(4)   | 1.387(8)   |
| C(4)-C(5)   | 1.377(9)   |
| C(5)-C(6)   | 1.386(7)   |
| C(7)-C(8)   | 1.366(8)   |
| C(8)-C(9)   | 1.376(8)   |
| C(9)-C(10)  | 1.383(8)   |
| C(10)-C(11) | 1.397(7)   |

|                   |            |
|-------------------|------------|
| C(12)-C(13)       | 1.377(7)   |
| C(13)-C(14)       | 1.376(7)   |
| C(14)-C(15)       | 1.385(7)   |
| C(15)-C(16)       | 1.392(6)   |
| C(17)-C(18)       | 1.385(6)   |
| C(17)-C(22)       | 1.392(7)   |
| C(18)-C(19)       | 1.375(7)   |
| C(19)-C(20)       | 1.378(9)   |
| C(20)-C(21)       | 1.391(8)   |
| C(21)-C(22)       | 1.400(7)   |
| C(23)-C(24)       | 1.365(7)   |
| C(24)-C(25)       | 1.389(7)   |
| C(25)-C(26)       | 1.378(7)   |
| C(26)-C(27)       | 1.394(6)   |
| C(28)-C(29)       | 1.374(7)   |
| C(29)-C(30)       | 1.385(7)   |
| C(30)-C(31)       | 1.388(7)   |
| C(31)-C(32)       | 1.387(6)   |
| C(33)-C(34)       | 1.317(14)  |
| C(34)-C(35)       | 1.377(13)  |
| C(35)-C(36)       | 1.341(13)  |
|                   |            |
| N(2)-Zn(1)-N(1)   | 92.92(15)  |
| N(2)-Zn(1)-Cl(1)  | 111.89(12) |
| N(1)-Zn(1)-Cl(1)  | 113.38(12) |
| N(2)-Zn(1)-Cl(2)  | 108.86(12) |
| N(1)-Zn(1)-Cl(2)  | 106.01(12) |
| Cl(1)-Zn(1)-Cl(2) | 120.25(5)  |
| N(4)-Zn(2)-N(3)   | 95.63(15)  |
| N(4)-Zn(2)-Cl(3)  | 109.45(11) |
| N(3)-Zn(2)-Cl(3)  | 110.19(11) |
| N(4)-Zn(2)-Cl(4)  | 110.43(12) |
| N(3)-Zn(2)-Cl(4)  | 109.87(12) |
| Cl(3)-Zn(2)-Cl(4) | 118.82(5)  |
| C(1)-P(1)-C(11)   | 102.5(2)   |
| C(1)-P(1)-C(16)   | 101.8(2)   |

|                   |          |
|-------------------|----------|
| C(11)-P(1)-C(16)  | 101.7(2) |
| C(17)-P(2)-C(27)  | 102.0(2) |
| C(17)-P(2)-C(32)  | 102.4(2) |
| C(27)-P(2)-C(32)  | 104.0(2) |
| C(33)-O(1)-C(36)  | 96.2(9)  |
| C(7)-N(1)-C(11)   | 118.8(4) |
| C(7)-N(1)-Zn(1)   | 118.6(3) |
| C(11)-N(1)-Zn(1)  | 122.6(3) |
| C(12)-N(2)-C(16)  | 119.4(4) |
| C(12)-N(2)-Zn(1)  | 118.0(3) |
| C(16)-N(2)-Zn(1)  | 122.4(3) |
| C(23)-N(3)-C(27)  | 119.0(4) |
| C(23)-N(3)-Zn(2)  | 119.5(3) |
| C(27)-N(3)-Zn(2)  | 121.5(3) |
| C(28)-N(4)-C(32)  | 118.4(4) |
| C(28)-N(4)-Zn(2)  | 119.6(3) |
| C(32)-N(4)-Zn(2)  | 122.0(3) |
| C(2)-C(1)-C(6)    | 118.9(5) |
| C(2)-C(1)-P(1)    | 124.8(4) |
| C(6)-C(1)-P(1)    | 116.3(4) |
| C(3)-C(2)-C(1)    | 120.4(5) |
| C(2)-C(3)-C(4)    | 120.5(6) |
| C(5)-C(4)-C(3)    | 119.5(5) |
| C(4)-C(5)-C(6)    | 120.9(5) |
| C(5)-C(6)-C(1)    | 119.8(5) |
| N(1)-C(7)-C(8)    | 123.4(5) |
| C(7)-C(8)-C(9)    | 118.1(5) |
| C(8)-C(9)-C(10)   | 120.0(5) |
| C(9)-C(10)-C(11)  | 119.2(5) |
| N(1)-C(11)-C(10)  | 120.4(4) |
| N(1)-C(11)-P(1)   | 116.9(3) |
| C(10)-C(11)-P(1)  | 122.3(4) |
| N(2)-C(12)-C(13)  | 122.2(5) |
| C(14)-C(13)-C(12) | 118.6(5) |
| C(13)-C(14)-C(15) | 119.9(5) |
| C(14)-C(15)-C(16) | 119.1(4) |

|                   |           |
|-------------------|-----------|
| N(2)-C(16)-C(15)  | 120.7(4)  |
| N(2)-C(16)-P(1)   | 116.7(3)  |
| C(15)-C(16)-P(1)  | 122.2(4)  |
| C(18)-C(17)-C(22) | 119.0(4)  |
| C(18)-C(17)-P(2)  | 117.4(4)  |
| C(22)-C(17)-P(2)  | 123.6(3)  |
| C(19)-C(18)-C(17) | 121.5(5)  |
| C(18)-C(19)-C(20) | 119.9(5)  |
| C(19)-C(20)-C(21) | 119.7(5)  |
| C(20)-C(21)-C(22) | 120.3(5)  |
| C(17)-C(22)-C(21) | 119.5(5)  |
| N(3)-C(23)-C(24)  | 123.2(5)  |
| C(23)-C(24)-C(25) | 118.4(5)  |
| C(26)-C(25)-C(24) | 119.1(5)  |
| C(25)-C(26)-C(27) | 119.9(4)  |
| N(3)-C(27)-C(26)  | 120.3(4)  |
| N(3)-C(27)-P(2)   | 117.4(3)  |
| C(26)-C(27)-P(2)  | 121.6(3)  |
| N(4)-C(28)-C(29)  | 123.4(4)  |
| C(28)-C(29)-C(30) | 118.3(5)  |
| C(29)-C(30)-C(31) | 118.9(5)  |
| C(32)-C(31)-C(30) | 119.9(4)  |
| N(4)-C(32)-C(31)  | 120.9(4)  |
| N(4)-C(32)-P(2)   | 117.3(3)  |
| C(31)-C(32)-P(2)  | 121.3(3)  |
| C(34)-C(33)-O(1)  | 113.0(10) |
| C(33)-C(34)-C(35) | 109.3(10) |
| C(36)-C(35)-C(34) | 108.7(10) |
| C(35)-C(36)-O(1)  | 110.1(9)  |

---

Symmetry transformations used to generate equivalent atoms:

Table 4. Anisotropic displacement parameters ( $\text{\AA}^2 \times 10^3$ ) for rkb10\_0m. The anisotropic displacement factor exponent takes the form:  $-2\pi^2 [ h^2 a^{*2} U^{11} + \dots + 2 h k a^* b^* U^{12} ]$

|       | U <sup>11</sup> | U <sup>22</sup> | U <sup>33</sup> | U <sup>23</sup> | U <sup>13</sup> | U <sup>12</sup> |
|-------|-----------------|-----------------|-----------------|-----------------|-----------------|-----------------|
| Zn(1) | 28(1)           | 35(1)           | 24(1)           | 6(1)            | 4(1)            | 3(1)            |
| Zn(2) | 25(1)           | 31(1)           | 20(1)           | -2(1)           | 1(1)            | -3(1)           |
| P(1)  | 23(1)           | 30(1)           | 26(1)           | 1(1)            | 5(1)            | 1(1)            |
| P(2)  | 23(1)           | 28(1)           | 20(1)           | -1(1)           | 4(1)            | -1(1)           |
| Cl(1) | 41(1)           | 48(1)           | 31(1)           | 4(1)            | 14(1)           | -2(1)           |
| Cl(2) | 32(1)           | 66(1)           | 25(1)           | 6(1)            | 2(1)            | 12(1)           |
| Cl(3) | 35(1)           | 51(1)           | 22(1)           | -6(1)           | 4(1)            | -3(1)           |
| Cl(4) | 30(1)           | 55(1)           | 32(1)           | -4(1)           | 9(1)            | -7(1)           |
| O(1)  | 287(15)         | 321(17)         | 254(14)         | -195(13)        | 176(13)         | -209(14)        |
| N(1)  | 29(2)           | 26(2)           | 23(2)           | 4(2)            | 7(2)            | 6(2)            |
| N(2)  | 23(2)           | 32(2)           | 23(2)           | 1(2)            | 4(2)            | 3(2)            |
| N(3)  | 26(2)           | 28(2)           | 20(2)           | -1(2)           | 4(2)            | -3(2)           |
| N(4)  | 26(2)           | 27(2)           | 20(2)           | -1(2)           | 2(2)            | -4(2)           |
| C(1)  | 22(2)           | 32(2)           | 30(2)           | -4(2)           | -1(2)           | -1(2)           |
| C(2)  | 29(3)           | 41(3)           | 30(3)           | -3(2)           | 3(2)            | 7(2)            |
| C(3)  | 53(4)           | 45(3)           | 30(3)           | 2(2)            | 4(3)            | 3(3)            |
| C(4)  | 43(3)           | 39(3)           | 40(3)           | -5(2)           | -14(3)          | 7(2)            |
| C(5)  | 29(3)           | 47(3)           | 45(3)           | -1(3)           | -6(2)           | 5(2)            |
| C(6)  | 31(3)           | 39(3)           | 35(3)           | -5(2)           | 3(2)            | 2(2)            |
| C(7)  | 38(3)           | 31(3)           | 37(3)           | 12(2)           | 12(2)           | 6(2)            |
| C(8)  | 47(3)           | 31(3)           | 45(3)           | 4(2)            | 19(3)           | 4(2)            |
| C(9)  | 51(4)           | 34(3)           | 42(3)           | -7(2)           | 8(3)            | -4(3)           |
| C(10) | 35(3)           | 37(3)           | 37(3)           | 1(2)            | 6(2)            | 0(2)            |
| C(11) | 31(2)           | 26(2)           | 28(2)           | 2(2)            | 10(2)           | -1(2)           |
| C(12) | 24(2)           | 39(3)           | 30(2)           | 3(2)            | 0(2)            | -5(2)           |
| C(13) | 31(3)           | 39(3)           | 37(3)           | 4(2)            | 7(2)            | -4(2)           |
| C(14) | 38(3)           | 30(3)           | 33(3)           | 4(2)            | 11(2)           | 1(2)            |
| C(15) | 30(3)           | 31(2)           | 25(2)           | 0(2)            | 8(2)            | 3(2)            |
| C(16) | 21(2)           | 27(2)           | 24(2)           | 0(2)            | 5(2)            | 2(2)            |
| C(17) | 28(2)           | 26(2)           | 20(2)           | -2(2)           | 2(2)            | 0(2)            |
| C(18) | 38(3)           | 42(3)           | 19(2)           | 2(2)            | 6(2)            | 5(2)            |



|       |         |         |         |          |         |          |
|-------|---------|---------|---------|----------|---------|----------|
| C(19) | 61(4)   | 52(3)   | 17(2)   | -5(2)    | -1(2)   | 6(3)     |
| C(20) | 51(4)   | 42(3)   | 28(3)   | -3(2)    | -13(2)  | 1(3)     |
| C(21) | 30(3)   | 38(3)   | 41(3)   | -4(2)    | -5(2)   | -1(2)    |
| C(22) | 28(2)   | 32(2)   | 23(2)   | -3(2)    | 4(2)    | -2(2)    |
| C(23) | 48(3)   | 36(3)   | 22(2)   | 5(2)     | 8(2)    | 0(2)     |
| C(24) | 47(3)   | 29(3)   | 37(3)   | 8(2)     | 12(2)   | 0(2)     |
| C(25) | 31(3)   | 22(2)   | 45(3)   | -1(2)    | 11(2)   | 0(2)     |
| C(26) | 24(2)   | 26(2)   | 31(2)   | -8(2)    | 4(2)    | -1(2)    |
| C(27) | 21(2)   | 26(2)   | 22(2)   | -5(2)    | 5(2)    | 0(2)     |
| C(28) | 33(3)   | 29(2)   | 23(2)   | -4(2)    | 5(2)    | -5(2)    |
| C(29) | 34(3)   | 26(2)   | 36(3)   | -4(2)    | 8(2)    | -1(2)    |
| C(30) | 31(3)   | 24(2)   | 39(3)   | 5(2)     | 3(2)    | 3(2)     |
| C(31) | 24(2)   | 29(2)   | 31(2)   | 1(2)     | 3(2)    | -2(2)    |
| C(32) | 20(2)   | 27(2)   | 23(2)   | -2(2)    | 6(2)    | -2(2)    |
| C(33) | 300(20) | 195(15) | 290(20) | -181(16) | 250(20) | -181(16) |
| C(34) | 101(8)  | 67(6)   | 132(9)  | -11(6)   | 5(7)    | 13(5)    |
| C(35) | 125(9)  | 66(6)   | 206(14) | -29(7)   | 105(10) | -12(6)   |
| C(36) | 167(12) | 69(6)   | 92(7)   | -29(6)   | 17(8)   | -10(7)   |

---

Table 5. Hydrogen coordinates ( $\times 10^4$ ) and isotropic displacement parameters ( $\text{\AA}^2 \times 10^{-3}$ ) for rkb10\_0m.

|        | x     | y     | z     | U(eq) |
|--------|-------|-------|-------|-------|
| H(2A)  | 9894  | 1516  | 9322  | 41    |
| H(3A)  | 10689 | 1085  | 10369 | 51    |
| H(4A)  | 12111 | 696   | 10439 | 51    |
| H(5A)  | 12729 | 726   | 9453  | 50    |
| H(6A)  | 11951 | 1184  | 8398  | 42    |
| H(7A)  | 8158  | 4385  | 7332  | 42    |
| H(8A)  | 8564  | 5561  | 8228  | 48    |
| H(9A)  | 9757  | 5153  | 9016  | 51    |
| H(10A) | 10454 | 3515  | 8927  | 44    |
| H(12A) | 7724  | 279   | 6758  | 38    |
| H(13A) | 7761  | -1338 | 7360  | 43    |
| H(14A) | 8873  | -1667 | 8240  | 40    |
| H(15A) | 9927  | -368  | 8501  | 34    |
| H(18A) | 5610  | 3039  | 4133  | 40    |
| H(19A) | 6686  | 3388  | 5023  | 53    |
| H(20A) | 8064  | 3413  | 4819  | 51    |
| H(21A) | 8355  | 3107  | 3710  | 45    |
| H(22A) | 7258  | 2810  | 2800  | 33    |
| H(23A) | 4775  | 4310  | 531   | 42    |
| H(24A) | 5416  | 5948  | 813   | 45    |
| H(25A) | 6154  | 6195  | 1928  | 38    |
| H(26A) | 6219  | 4774  | 2714  | 32    |
| H(28A) | 5302  | 94    | 892   | 34    |
| H(29A) | 6172  | -1204 | 1466  | 38    |
| H(30A) | 6755  | -892  | 2618  | 38    |
| H(31A) | 6523  | 782   | 3116  | 34    |
| H(33A) | 1872  | 5864  | 10338 | 288   |
| H(33B) | 2497  | 5159  | 10853 | 288   |
| H(34A) | 3381  | 5578  | 10312 | 122   |
| H(34B) | 2719  | 6093  | 9725  | 122   |

|        |      |      |      |     |
|--------|------|------|------|-----|
| H(35A) | 2836 | 4787 | 9104 | 149 |
| H(35B) | 3516 | 4285 | 9685 | 149 |
| H(36A) | 2698 | 3182 | 9945 | 132 |
| H(36B) | 2098 | 3523 | 9267 | 132 |

---

Table 6. Torsion angles [ $^{\circ}$ ] for rkbb10\_0m.

|                        |           |
|------------------------|-----------|
| N(2)-Zn(1)-N(1)-C(7)   | -138.5(4) |
| Cl(1)-Zn(1)-N(1)-C(7)  | 106.1(4)  |
| Cl(2)-Zn(1)-N(1)-C(7)  | -28.0(4)  |
| N(2)-Zn(1)-N(1)-C(11)  | 43.2(4)   |
| Cl(1)-Zn(1)-N(1)-C(11) | -72.2(4)  |
| Cl(2)-Zn(1)-N(1)-C(11) | 153.8(3)  |
| N(1)-Zn(1)-N(2)-C(12)  | 136.6(4)  |
| Cl(1)-Zn(1)-N(2)-C(12) | -106.7(4) |
| Cl(2)-Zn(1)-N(2)-C(12) | 28.6(4)   |
| N(1)-Zn(1)-N(2)-C(16)  | -38.5(4)  |
| Cl(1)-Zn(1)-N(2)-C(16) | 78.2(4)   |
| Cl(2)-Zn(1)-N(2)-C(16) | -146.5(3) |
| N(4)-Zn(2)-N(3)-C(23)  | 140.2(4)  |
| Cl(3)-Zn(2)-N(3)-C(23) | 27.1(4)   |
| Cl(4)-Zn(2)-N(3)-C(23) | -105.6(4) |
| N(4)-Zn(2)-N(3)-C(27)  | -37.4(4)  |
| Cl(3)-Zn(2)-N(3)-C(27) | -150.5(3) |
| Cl(4)-Zn(2)-N(3)-C(27) | 76.7(4)   |
| N(3)-Zn(2)-N(4)-C(28)  | -140.7(4) |
| Cl(3)-Zn(2)-N(4)-C(28) | -26.9(4)  |
| Cl(4)-Zn(2)-N(4)-C(28) | 105.7(3)  |
| N(3)-Zn(2)-N(4)-C(32)  | 42.6(4)   |
| Cl(3)-Zn(2)-N(4)-C(32) | 156.3(3)  |
| Cl(4)-Zn(2)-N(4)-C(32) | -71.0(4)  |
| C(11)-P(1)-C(1)-C(2)   | 48.4(5)   |
| C(16)-P(1)-C(1)-C(2)   | -56.6(5)  |
| C(11)-P(1)-C(1)-C(6)   | -132.2(4) |
| C(16)-P(1)-C(1)-C(6)   | 122.8(4)  |
| C(6)-C(1)-C(2)-C(3)    | 0.9(8)    |
| P(1)-C(1)-C(2)-C(3)    | -179.7(4) |
| C(1)-C(2)-C(3)-C(4)    | -0.6(9)   |
| C(2)-C(3)-C(4)-C(5)    | -0.3(9)   |
| C(3)-C(4)-C(5)-C(6)    | 0.9(9)    |
| C(4)-C(5)-C(6)-C(1)    | -0.5(9)   |

|                         |           |
|-------------------------|-----------|
| C(2)-C(1)-C(6)-C(5)     | -0.4(8)   |
| P(1)-C(1)-C(6)-C(5)     | -179.8(4) |
| C(11)-N(1)-C(7)-C(8)    | 2.7(8)    |
| Zn(1)-N(1)-C(7)-C(8)    | -175.6(4) |
| N(1)-C(7)-C(8)-C(9)     | 0.4(8)    |
| C(7)-C(8)-C(9)-C(10)    | -2.6(9)   |
| C(8)-C(9)-C(10)-C(11)   | 1.6(9)    |
| C(7)-N(1)-C(11)-C(10)   | -3.7(7)   |
| Zn(1)-N(1)-C(11)-C(10)  | 174.5(4)  |
| C(7)-N(1)-C(11)-P(1)    | -176.6(4) |
| Zn(1)-N(1)-C(11)-P(1)   | 1.7(5)    |
| C(9)-C(10)-C(11)-N(1)   | 1.6(8)    |
| C(9)-C(10)-C(11)-P(1)   | 174.1(4)  |
| C(1)-P(1)-C(11)-N(1)    | -160.5(4) |
| C(16)-P(1)-C(11)-N(1)   | -55.4(4)  |
| C(1)-P(1)-C(11)-C(10)   | 26.8(5)   |
| C(16)-P(1)-C(11)-C(10)  | 131.9(4)  |
| C(16)-N(2)-C(12)-C(13)  | -1.9(8)   |
| Zn(1)-N(2)-C(12)-C(13)  | -177.2(4) |
| N(2)-C(12)-C(13)-C(14)  | 0.6(8)    |
| C(12)-C(13)-C(14)-C(15) | 0.3(8)    |
| C(13)-C(14)-C(15)-C(16) | 0.1(8)    |
| C(12)-N(2)-C(16)-C(15)  | 2.3(7)    |
| Zn(1)-N(2)-C(16)-C(15)  | 177.4(3)  |
| C(12)-N(2)-C(16)-P(1)   | 175.6(4)  |
| Zn(1)-N(2)-C(16)-P(1)   | -9.3(5)   |
| C(14)-C(15)-C(16)-N(2)  | -1.4(7)   |
| C(14)-C(15)-C(16)-P(1)  | -174.4(4) |
| C(1)-P(1)-C(16)-N(2)    | 165.7(4)  |
| C(11)-P(1)-C(16)-N(2)   | 60.1(4)   |
| C(1)-P(1)-C(16)-C(15)   | -21.0(4)  |
| C(11)-P(1)-C(16)-C(15)  | -126.7(4) |
| C(27)-P(2)-C(17)-C(18)  | 123.9(4)  |
| C(32)-P(2)-C(17)-C(18)  | -128.6(4) |
| C(27)-P(2)-C(17)-C(22)  | -57.4(4)  |
| C(32)-P(2)-C(17)-C(22)  | 50.1(4)   |

|                         |           |
|-------------------------|-----------|
| C(22)-C(17)-C(18)-C(19) | 0.9(8)    |
| P(2)-C(17)-C(18)-C(19)  | 179.7(4)  |
| C(17)-C(18)-C(19)-C(20) | -1.2(9)   |
| C(18)-C(19)-C(20)-C(21) | 0.4(9)    |
| C(19)-C(20)-C(21)-C(22) | 0.7(9)    |
| C(18)-C(17)-C(22)-C(21) | 0.2(7)    |
| P(2)-C(17)-C(22)-C(21)  | -178.5(4) |
| C(20)-C(21)-C(22)-C(17) | -1.0(8)   |
| C(27)-N(3)-C(23)-C(24)  | -3.2(8)   |
| Zn(2)-N(3)-C(23)-C(24)  | 179.1(4)  |
| N(3)-C(23)-C(24)-C(25)  | 1.5(9)    |
| C(23)-C(24)-C(25)-C(26) | 0.4(8)    |
| C(24)-C(25)-C(26)-C(27) | -0.6(7)   |
| C(23)-N(3)-C(27)-C(26)  | 2.9(7)    |
| Zn(2)-N(3)-C(27)-C(26)  | -179.4(3) |
| C(23)-N(3)-C(27)-P(2)   | 173.4(4)  |
| Zn(2)-N(3)-C(27)-P(2)   | -9.0(5)   |
| C(25)-C(26)-C(27)-N(3)  | -1.1(7)   |
| C(25)-C(26)-C(27)-P(2)  | -171.2(4) |
| C(17)-P(2)-C(27)-N(3)   | 163.6(4)  |
| C(32)-P(2)-C(27)-N(3)   | 57.3(4)   |
| C(17)-P(2)-C(27)-C(26)  | -26.1(4)  |
| C(32)-P(2)-C(27)-C(26)  | -132.4(4) |
| C(32)-N(4)-C(28)-C(29)  | 4.4(7)    |
| Zn(2)-N(4)-C(28)-C(29)  | -172.4(4) |
| N(4)-C(28)-C(29)-C(30)  | -0.8(8)   |
| C(28)-C(29)-C(30)-C(31) | -3.0(8)   |
| C(29)-C(30)-C(31)-C(32) | 3.1(8)    |
| C(28)-N(4)-C(32)-C(31)  | -4.2(7)   |
| Zn(2)-N(4)-C(32)-C(31)  | 172.5(3)  |
| C(28)-N(4)-C(32)-P(2)   | -176.5(3) |
| Zn(2)-N(4)-C(32)-P(2)   | 0.2(5)    |
| C(30)-C(31)-C(32)-N(4)  | 0.5(7)    |
| C(30)-C(31)-C(32)-P(2)  | 172.6(4)  |
| C(17)-P(2)-C(32)-N(4)   | -158.1(4) |
| C(27)-P(2)-C(32)-N(4)   | -52.1(4)  |

|                         |           |
|-------------------------|-----------|
| C(17)-P(2)-C(32)-C(31)  | 29.6(4)   |
| C(27)-P(2)-C(32)-C(31)  | 135.6(4)  |
| C(36)-O(1)-C(33)-C(34)  | 15(2)     |
| O(1)-C(33)-C(34)-C(35)  | -10(2)    |
| C(33)-C(34)-C(35)-C(36) | -1.4(19)  |
| C(34)-C(35)-C(36)-O(1)  | 11.5(17)  |
| C(33)-O(1)-C(36)-C(35)  | -15.6(18) |

**Crystallographic details for compound 2.**

Table 1. Crystal data and structure refinement for rkbb11\_0m. (CCDC 1029656)

|                                   |                                                           |                  |
|-----------------------------------|-----------------------------------------------------------|------------------|
| Identification code               | rkbb11_0m                                                 |                  |
| Empirical formula                 | C <sub>17</sub> H <sub>14</sub> Cl N P Zn <sub>0.50</sub> |                  |
| Formula weight                    | 331.40                                                    |                  |
| Temperature                       | 173(2) K                                                  |                  |
| Wavelength                        | 0.71073 Å                                                 |                  |
| Crystal system                    | Monoclinic                                                |                  |
| Space group                       | C2/c                                                      |                  |
| Unit cell dimensions              | a = 21.6754(6) Å                                          | α = 90°.         |
|                                   | b = 11.3153(3) Å                                          | β = 102.895(2)°. |
|                                   | c = 12.8588(3) Å                                          | γ = 90°.         |
| Volume                            | 3074.26(14) Å <sup>3</sup>                                |                  |
| Z                                 | 8                                                         |                  |
| Density (calculated)              | 1.432 Mg/m <sup>3</sup>                                   |                  |
| Absorption coefficient            | 1.104 mm <sup>-1</sup>                                    |                  |
| F(000)                            | 1360                                                      |                  |
| Crystal size                      | 0.24 x 0.11 x 0.11 mm <sup>3</sup>                        |                  |
| Theta range for data collection   | 2.04 to 28.33°.                                           |                  |
| Index ranges                      | -28 ≤ h ≤ 28, -15 ≤ k ≤ 15, -17 ≤ l ≤ 16                  |                  |
| Reflections collected             | 24258                                                     |                  |
| Independent reflections           | 3821 [R(int) = 0.0645]                                    |                  |
| Completeness to theta = 28.33°    | 99.8 %                                                    |                  |
| Absorption correction             | Semi-empirical from equivalents                           |                  |
| Max. and min. transmission        | 0.8929 and 0.7752                                         |                  |
| Refinement method                 | Full-matrix least-squares on F <sup>2</sup>               |                  |
| Data / restraints / parameters    | 3821 / 0 / 186                                            |                  |
| Goodness-of-fit on F <sup>2</sup> | 1.026                                                     |                  |
| Final R indices [I > 2σ(I)]       | R1 = 0.0359, wR2 = 0.0661                                 |                  |
| R indices (all data)              | R1 = 0.0640, wR2 = 0.0750                                 |                  |
| Largest diff. peak and hole       | 0.355 and -0.343 e.Å <sup>-3</sup>                        |                  |



Table 2. Atomic coordinates ( $\times 10^4$ ) and equivalent isotropic displacement parameters ( $\text{\AA}^2 \times 10^3$ ) for rkb11\_0m.  $U(\text{eq})$  is defined as one third of the trace of the orthogonalized  $U^{ij}$  tensor.

|       | x        | y       | z       | $U(\text{eq})$ |
|-------|----------|---------|---------|----------------|
| Zn(1) | 10000    | 8269(1) | 2500    | 22(1)          |
| P(1)  | 9119(1)  | 5852(1) | 2372(1) | 23(1)          |
| Cl(1) | 10648(1) | 9293(1) | 1676(1) | 31(1)          |
| N(1)  | 9310(1)  | 7722(2) | 1178(1) | 23(1)          |
| C(1)  | 8909(1)  | 6810(2) | 1187(2) | 23(1)          |
| C(2)  | 8381(1)  | 6645(2) | 361(2)  | 30(1)          |
| C(3)  | 8255(1)  | 7432(2) | -481(2) | 32(1)          |
| C(4)  | 8666(1)  | 8361(2) | -486(2) | 30(1)          |
| C(5)  | 9186(1)  | 8472(2) | 344(2)  | 29(1)          |
| C(6)  | 9221(1)  | 4431(2) | 1758(2) | 22(1)          |
| C(7)  | 9174(1)  | 3402(2) | 2328(2) | 26(1)          |
| C(8)  | 9278(1)  | 2311(2) | 1925(2) | 32(1)          |
| C(9)  | 9445(1)  | 2224(2) | 949(2)  | 36(1)          |
| C(10) | 9513(1)  | 3238(2) | 392(2)  | 34(1)          |
| C(11) | 9399(1)  | 4335(2) | 785(2)  | 28(1)          |
| C(12) | 8339(1)  | 5714(2) | 2702(2) | 26(1)          |
| C(13) | 7902(1)  | 4821(2) | 2335(2) | 35(1)          |
| C(14) | 7331(1)  | 4773(3) | 2657(2) | 47(1)          |
| C(15) | 7189(1)  | 5616(3) | 3327(2) | 51(1)          |
| C(16) | 7607(1)  | 6518(3) | 3675(2) | 53(1)          |
| C(17) | 8184(1)  | 6571(2) | 3374(2) | 39(1)          |

Table 3. Bond lengths [ $\text{\AA}$ ] and angles [ $^\circ$ ] for rkbb11\_0m.

|                      |            |
|----------------------|------------|
| Zn(1)-N(1)#1         | 2.0921(17) |
| Zn(1)-N(1)           | 2.0921(17) |
| Zn(1)-Cl(1)          | 2.2585(6)  |
| Zn(1)-Cl(1)#1        | 2.2586(6)  |
| P(1)-C(6)            | 1.827(2)   |
| P(1)-C(12)           | 1.839(2)   |
| P(1)-C(1)            | 1.842(2)   |
| N(1)-C(5)            | 1.346(3)   |
| N(1)-C(1)            | 1.351(3)   |
| C(1)-C(2)            | 1.390(3)   |
| C(2)-C(3)            | 1.380(3)   |
| C(3)-C(4)            | 1.380(3)   |
| C(4)-C(5)            | 1.375(3)   |
| C(6)-C(7)            | 1.392(3)   |
| C(6)-C(11)           | 1.394(3)   |
| C(7)-C(8)            | 1.377(3)   |
| C(8)-C(9)            | 1.385(3)   |
| C(9)-C(10)           | 1.377(3)   |
| C(10)-C(11)          | 1.383(3)   |
| C(12)-C(17)          | 1.389(3)   |
| C(12)-C(13)          | 1.394(3)   |
| C(13)-C(14)          | 1.390(3)   |
| C(14)-C(15)          | 1.366(4)   |
| C(15)-C(16)          | 1.371(4)   |
| C(16)-C(17)          | 1.391(4)   |
|                      |            |
| N(1)#1-Zn(1)-N(1)    | 145.58(10) |
| N(1)#1-Zn(1)-Cl(1)   | 97.27(5)   |
| N(1)-Zn(1)-Cl(1)     | 100.20(5)  |
| N(1)#1-Zn(1)-Cl(1)#1 | 100.20(5)  |
| N(1)-Zn(1)-Cl(1)#1   | 97.27(5)   |
| Cl(1)-Zn(1)-Cl(1)#1  | 118.24(3)  |
| C(6)-P(1)-C(12)      | 103.34(10) |
| C(6)-P(1)-C(1)       | 101.02(9)  |

|                   |            |
|-------------------|------------|
| C(12)-P(1)-C(1)   | 99.80(10)  |
| C(5)-N(1)-C(1)    | 118.33(18) |
| C(5)-N(1)-Zn(1)   | 116.08(14) |
| C(1)-N(1)-Zn(1)   | 124.29(14) |
| N(1)-C(1)-C(2)    | 121.2(2)   |
| N(1)-C(1)-P(1)    | 114.57(15) |
| C(2)-C(1)-P(1)    | 124.27(17) |
| C(3)-C(2)-C(1)    | 119.9(2)   |
| C(4)-C(3)-C(2)    | 118.7(2)   |
| C(5)-C(4)-C(3)    | 119.0(2)   |
| N(1)-C(5)-C(4)    | 122.9(2)   |
| C(7)-C(6)-C(11)   | 118.4(2)   |
| C(7)-C(6)-P(1)    | 118.59(16) |
| C(11)-C(6)-P(1)   | 122.79(17) |
| C(8)-C(7)-C(6)    | 121.0(2)   |
| C(7)-C(8)-C(9)    | 120.2(2)   |
| C(10)-C(9)-C(8)   | 119.4(2)   |
| C(9)-C(10)-C(11)  | 120.6(2)   |
| C(10)-C(11)-C(6)  | 120.3(2)   |
| C(17)-C(12)-C(13) | 118.4(2)   |
| C(17)-C(12)-P(1)  | 116.51(18) |
| C(13)-C(12)-P(1)  | 125.06(18) |
| C(14)-C(13)-C(12) | 120.7(2)   |
| C(15)-C(14)-C(13) | 120.1(3)   |
| C(14)-C(15)-C(16) | 120.1(3)   |
| C(15)-C(16)-C(17) | 120.7(3)   |
| C(12)-C(17)-C(16) | 120.1(3)   |

---

Symmetry transformations used to generate equivalent atoms:

#1  $-x+2, y, -z+1/2$

Table 4. Anisotropic displacement parameters ( $\text{\AA}^2 \times 10^3$ ) for rkb11\_0m. The anisotropic displacement factor exponent takes the form:  $-2\pi^2 [ h^2 a^{*2} U^{11} + \dots + 2 h k a^* b^* U^{12} ]$

|       | U <sup>11</sup> | U <sup>22</sup> | U <sup>33</sup> | U <sup>23</sup> | U <sup>13</sup> | U <sup>12</sup> |
|-------|-----------------|-----------------|-----------------|-----------------|-----------------|-----------------|
| Zn(1) | 21(1)           | 20(1)           | 25(1)           | 0               | 5(1)            | 0               |
| P(1)  | 23(1)           | 22(1)           | 24(1)           | 0(1)            | 5(1)            | -2(1)           |
| Cl(1) | 30(1)           | 30(1)           | 34(1)           | 3(1)            | 10(1)           | -8(1)           |
| N(1)  | 22(1)           | 22(1)           | 26(1)           | 1(1)            | 7(1)            | 0(1)            |
| C(1)  | 23(1)           | 20(1)           | 27(1)           | -2(1)           | 8(1)            | -1(1)           |
| C(2)  | 30(1)           | 28(1)           | 31(1)           | 2(1)            | 3(1)            | -6(1)           |
| C(3)  | 28(1)           | 39(1)           | 28(1)           | 0(1)            | 2(1)            | 0(1)            |
| C(4)  | 32(1)           | 34(1)           | 26(1)           | 8(1)            | 6(1)            | 4(1)            |
| C(5)  | 29(1)           | 26(1)           | 31(1)           | 5(1)            | 7(1)            | -3(1)           |
| C(6)  | 17(1)           | 24(1)           | 24(1)           | 0(1)            | 2(1)            | -1(1)           |
| C(7)  | 21(1)           | 28(1)           | 29(1)           | 4(1)            | 8(1)            | -3(1)           |
| C(8)  | 27(1)           | 24(1)           | 43(1)           | 6(1)            | 4(1)            | -1(1)           |
| C(9)  | 35(2)           | 27(1)           | 41(1)           | -8(1)           | 0(1)            | 4(1)            |
| C(10) | 38(1)           | 38(1)           | 25(1)           | -6(1)           | 5(1)            | 8(1)            |
| C(11) | 30(1)           | 27(1)           | 26(1)           | 3(1)            | 5(1)            | 1(1)            |
| C(12) | 24(1)           | 29(1)           | 24(1)           | 5(1)            | 6(1)            | 3(1)            |
| C(13) | 25(1)           | 31(1)           | 49(2)           | 3(1)            | 10(1)           | 3(1)            |
| C(14) | 23(1)           | 47(2)           | 70(2)           | 18(2)           | 11(1)           | 4(1)            |
| C(15) | 29(2)           | 75(2)           | 53(2)           | 23(2)           | 19(1)           | 17(2)           |
| C(16) | 45(2)           | 75(2)           | 42(2)           | -4(2)           | 19(1)           | 21(2)           |
| C(17) | 36(2)           | 45(2)           | 35(1)           | -2(1)           | 8(1)            | 8(1)            |

Table 5. Hydrogen coordinates ( $\times 10^4$ ) and isotropic displacement parameters ( $\text{\AA}^2 \times 10^{-3}$ ) for rkb11\_0m.

|        | x    | y    | z     | U(eq) |
|--------|------|------|-------|-------|
| H(2A)  | 8112 | 6007 | 375   | 37    |
| H(3A)  | 7899 | 7337 | -1033 | 39    |
| H(4A)  | 8592 | 8904 | -1044 | 36    |
| H(5A)  | 9465 | 9093 | 330   | 34    |
| H(7A)  | 9071 | 3452 | 2991  | 31    |
| H(8A)  | 9235 | 1631 | 2309  | 38    |
| H(9A)  | 9511 | 1487 | 673   | 43    |
| H(10A) | 9636 | 3183 | -254  | 40    |
| H(11A) | 9442 | 5013 | 398   | 33    |
| H(13A) | 7993 | 4251 | 1870  | 42    |
| H(14A) | 7046 | 4166 | 2417  | 56    |
| H(15A) | 6809 | 5579 | 3548  | 61    |
| H(16A) | 7503 | 7100 | 4118  | 63    |
| H(17A) | 8466 | 7181 | 3622  | 46    |

Table 6. Torsion angles [°] for rkbb11\_0m.

|                         |             |
|-------------------------|-------------|
| N(1)#1-Zn(1)-N(1)-C(5)  | -152.43(17) |
| Cl(1)-Zn(1)-N(1)-C(5)   | -33.07(16)  |
| Cl(1)#1-Zn(1)-N(1)-C(5) | 87.43(16)   |
| N(1)#1-Zn(1)-N(1)-C(1)  | 40.82(16)   |
| Cl(1)-Zn(1)-N(1)-C(1)   | 160.18(16)  |
| Cl(1)#1-Zn(1)-N(1)-C(1) | -79.32(17)  |
| C(5)-N(1)-C(1)-C(2)     | -0.1(3)     |
| Zn(1)-N(1)-C(1)-C(2)    | 166.37(16)  |
| C(5)-N(1)-C(1)-P(1)     | -179.28(16) |
| Zn(1)-N(1)-C(1)-P(1)    | -12.8(2)    |
| C(6)-P(1)-C(1)-N(1)     | -120.20(16) |
| C(12)-P(1)-C(1)-N(1)    | 134.01(16)  |
| C(6)-P(1)-C(1)-C(2)     | 60.6(2)     |
| C(12)-P(1)-C(1)-C(2)    | -45.1(2)    |
| N(1)-C(1)-C(2)-C(3)     | -0.9(3)     |
| P(1)-C(1)-C(2)-C(3)     | 178.25(18)  |
| C(1)-C(2)-C(3)-C(4)     | 0.9(4)      |
| C(2)-C(3)-C(4)-C(5)     | 0.0(4)      |
| C(1)-N(1)-C(5)-C(4)     | 1.0(3)      |
| Zn(1)-N(1)-C(5)-C(4)    | -166.52(18) |
| C(3)-C(4)-C(5)-N(1)     | -1.0(4)     |
| C(12)-P(1)-C(6)-C(7)    | -55.67(19)  |
| C(1)-P(1)-C(6)-C(7)     | -158.64(17) |
| C(12)-P(1)-C(6)-C(11)   | 130.25(19)  |
| C(1)-P(1)-C(6)-C(11)    | 27.3(2)     |
| C(11)-C(6)-C(7)-C(8)    | -2.4(3)     |
| P(1)-C(6)-C(7)-C(8)     | -176.75(17) |
| C(6)-C(7)-C(8)-C(9)     | 1.4(3)      |
| C(7)-C(8)-C(9)-C(10)    | 0.6(4)      |
| C(8)-C(9)-C(10)-C(11)   | -1.7(4)     |
| C(9)-C(10)-C(11)-C(6)   | 0.7(4)      |
| C(7)-C(6)-C(11)-C(10)   | 1.4(3)      |
| P(1)-C(6)-C(11)-C(10)   | 175.44(17)  |
| C(6)-P(1)-C(12)-C(17)   | 167.47(17)  |

|                         |            |
|-------------------------|------------|
| C(1)-P(1)-C(12)-C(17)   | -88.62(18) |
| C(6)-P(1)-C(12)-C(13)   | -12.1(2)   |
| C(1)-P(1)-C(12)-C(13)   | 91.8(2)    |
| C(17)-C(12)-C(13)-C(14) | -1.6(3)    |
| P(1)-C(12)-C(13)-C(14)  | 177.96(18) |
| C(12)-C(13)-C(14)-C(15) | 1.0(4)     |
| C(13)-C(14)-C(15)-C(16) | 0.6(4)     |
| C(14)-C(15)-C(16)-C(17) | -1.5(4)    |
| C(13)-C(12)-C(17)-C(16) | 0.7(3)     |
| P(1)-C(12)-C(17)-C(16)  | -178.9(2)  |
| C(15)-C(16)-C(17)-C(12) | 0.9(4)     |

---

Symmetry transformations used to generate equivalent atoms:

#1  $-x+2, y, -z+1/2$
